# Supplementary material for: Toward streamline variant classification: discrepancies in variant nomenclature and syntax for ClinVar pathogenic variants across annotation tools
Source: Hum Genomics. 2025 Jun 21;19:70. doi: 10.1186/s40246-025-00778-x (PMC12181866; doi:10.1186/s40246-025-00778-x)
Supplement: Supplementary file 17 — Additional file 17 [file 40246_2025_778_MOESM17_ESM.xlsx]

## Sheet: HGVSc
Fig4A and Figure S3BA	ClinVar
	Deletion	Duplication	Indel	Insertion	Inversion	Microsatellite	SNV	All
	11012	4946	230	706	39	2952	144640	164525
ANNOVAR not match with ClinVar	5715	3103	86	290	39	2364	28984	40581
ANNOVAR match with ClinVar	5297	1843	144	416	0	588	115656	123944
Fraction of ANNOVAR match with ClinVar	0.481021	0.372624	0.626087	0.589235	0	0.199187	0.799613	0.753344
	ClinVar
	Deletion	Duplication	Indel	Insertion	Inversion	Microsatellite	SNV	All
	11012	4946	230	706	39	2952	144640	164525
SnpEff not match with ClinVar	53	326	1	2	39	1154	430	2005
SnpEff match with ClinVar	10959	4620	229	704	0	1798	144210	162520
Fraction of SnpEff match with ClinVar	0.995187	0.934088	0.995652	0.997167	0	0.609079	0.997027	0.987813
	ClinVar
	Deletion	Duplication	Indel	Insertion	Inversion	Microsatellite	SNV	All
	11012	4946	230	706	39	2952	144640	164525
VEP not match with ClinVar	21	2243	0	2	0	1216	245	3727
VEP match with ClinVar	10991	2703	230	704	39	1736	144395	160798
Fraction of VEP match with ClinVar	0.998093	0.546502	1	0.997167	1	0.588076	0.998306	0.977347

## Sheet: HGVSp
Fig4A and FigS3B	ClinVar
	Deletion	Duplication	Indel	Insertion	Inversion	Microsatellite	SNV	All
	8638	3667	144	473	27	2080	107751	122780
ANNOVAR not match with ClinVar	617	206	51	33	4	378	1045	2334
ANNOVAR match with ClinVar	8021	3461	93	440	23	1702	106706	120446
Fraction of ANNOVAR match with ClinVar	0.928571	0.943823	0.645833	0.930233	0.851852	0.818269	0.990302	0.98099
	ClinVar
	Deletion	Duplication	Indel	Insertion	Inversion	Microsatellite	SNV	All
	8638	3667	144	473	27	2080	107751	122780
SnpEff not match with ClinVar	591	425	40	57	4	346	287	1750
SnpEff match with ClinVar	8047	3242	104	416	23	1734	107464	121030
Fraction of SnpEff match with ClinVar	0.931581	0.884101	0.722222	0.879493	0.851852	0.833654	0.997336	0.985747
	ClinVar
	Deletion	Duplication	Indel	Insertion	Inversion	Microsatellite	SNV	All
	8638	3667	144	473	27	2080	107751	122780
VEP not match with ClinVar	540	106	4	27	0	268	123	1068
VEP match with ClinVar	8098	3561	140	446	27	1812	107628	121712
Fraction of VEP match with ClinVar	0.937486	0.971094	0.972222	0.942918	1	0.871154	0.998858	0.991302

## Sheet: Coding impact
Fig4A,D	ClinVar
	LoF	Missense	Length_change	Synonymous	Other	All	Not LOF
	31640	29978	1036	66872	35023	164549	132909
ANNOVAR not match with ClinVar	532	362	9	495	268	1666
ANNOVAR match with ClinVar	31108	29616	1027	66377	34755	162883
Fraction of ANNOVAR match with ClinVar	0.983186	0.987924	0.991313	0.992598	0.992348	0.989875
	ClinVar
	LoF	Missense	Length_change	Synonymous	Other	All	Not LOF
	31640	29978	1036	66872	35023	164549	132909
SnpEff not match with ClinVar	782	102	3	159	317	1363
SnpEff match with ClinVar	30858	29876	1033	66713	34706	163186
Fraction of SnpEff match with ClinVar	0.975284	0.996598	0.997104	0.997622	0.990949	0.991717
	ClinVar
	LoF	Missense	Length_change	Synonymous	Other	All	Not LOF
	31640	29978	1036	66872	35023	164549	132909
VEP not match with ClinVar	882	11	1	71	101	1066
VEP match with ClinVar	30758	29967	1035	66801	34922	163483
Fraction of VEP match with ClinVar	0.972124	0.999633	0.999035	0.998938	0.997116	0.993522
