# Supplementary material for: Toward streamline variant classification: discrepancies in variant nomenclature and syntax for ClinVar pathogenic variants across annotation tools
Source: Hum Genomics. 2025 Jun 21;19:70. doi: 10.1186/s40246-025-00778-x (PMC12181866; doi:10.1186/s40246-025-00778-x)
Supplement: Supplementary file 19 — Additional file 19 [file 40246_2025_778_MOESM19_ESM.xlsx]

## Sheet: ANNOVAR_PVS1-loss no conflict
VariationID	AlleleID	Type	NM	ClinVar_CLNSIG	ClinVar_CLNREVSTAT	ClinVar_Coding_impact	ClinVar_Category	ACMG_rule_ClinVar_coding impact	ClinVar_Curated_Classes	ANNOVAR_coding_impact	ACMG_rule_ANNOVA_ coding_impact	ANNOVAR_Curated_Classes	Grade_Change
193432	190596	Duplication	NM_020451	Pathogenic	criteria_provided,_multiple_submitters,_no_conflicts	frameshift_variant	LOF	PVS1|PM2|PP5m	P	unknown	PM2|PP5m	VUS	Downgrade
193429	190593	Duplication	NM_020451	Pathogenic	criteria_provided,_multiple_submitters,_no_conflicts	frameshift_variant	LOF	PVS1|PM2|PP5m	P	unknown	PM2|PP5m	VUS	Downgrade
837936	823853	single nucleotide variant	NM_020451	Pathogenic	criteria_provided,_multiple_submitters,_no_conflicts	nonsense	LOF	PVS1|PM2|PP5m	P	unknown	PP3|PM2|PP5m	VUS	Downgrade
952054	921982	single nucleotide variant	NM_020451	Pathogenic	criteria_provided,_multiple_submitters,_no_conflicts	nonsense	LOF	PVS1|PM2|PP5m	P	unknown	PP3|PM2|PP5m	VUS	Downgrade
419984	405144	Duplication	NM_020451	Pathogenic	criteria_provided,_multiple_submitters,_no_conflicts	frameshift_variant	LOF	PVS1|PM2|PP5m	P	unknown	PM2|PP5m	VUS	Downgrade
4494	19533	Duplication	NM_020451	Pathogenic	criteria_provided,_multiple_submitters,_no_conflicts	frameshift_variant	LOF	PVS1|PM2|PP5m	P	unknown	PP3|PM2|PP5m	VUS	Downgrade
944327	921983	Microsatellite	NM_020451	Pathogenic	criteria_provided,_multiple_submitters,_no_conflicts	frameshift_variant	LOF	PVS1|PP5m	LP	unknown	PP3|PP5m	VUS	Downgrade
280493	263988	Deletion	NM_020451	Pathogenic	criteria_provided,_multiple_submitters,_no_conflicts	frameshift_variant	LOF	PVS1|PP5m	LP	unknown	PP3|PP5m	VUS	Downgrade
199156	196315	single nucleotide variant	NM_020451	Pathogenic	criteria_provided,_multiple_submitters,_no_conflicts	nonsense	LOF	PVS1|PM2|PP5m	P	unknown	PP3|PM2|PP5m	VUS	Downgrade
664698	627736	single nucleotide variant	NM_020451	Pathogenic	criteria_provided,_multiple_submitters,_no_conflicts	nonsense	LOF	PVS1|PM2|PP5m	P	unknown	PP3|PM2|PP5m	VUS	Downgrade
835943	823858	Duplication	NM_020451	Pathogenic	criteria_provided,_multiple_submitters,_no_conflicts	frameshift_variant	LOF	PVS1|PM2|PP5m	P	unknown	PM2|PP5m	VUS	Downgrade
95958	101854	single nucleotide variant	NM_020451	Pathogenic	criteria_provided,_multiple_submitters,_no_conflicts	nonsense	LOF	PVS1|PM2|PP5m	P	unknown	PP3|PM2|PP5m	VUS	Downgrade
575921	557246	single nucleotide variant	NM_020451	Pathogenic	criteria_provided,_multiple_submitters,_no_conflicts	nonsense	LOF	PVS1|PM2|PP5m	P	unknown	PP3|PM2|PP5m	VUS	Downgrade
1180703	1170159	Deletion	NM_020451	Pathogenic	criteria_provided,_multiple_submitters,_no_conflicts	frameshift_variant	LOF	PVS1|PP5m	LP	unknown	PP5m	VUS	Downgrade
461630	448072	single nucleotide variant	NM_020451	Pathogenic	criteria_provided,_multiple_submitters,_no_conflicts	nonsense	LOF	PVS1|PM2|PP5m	P	unknown	PP3|PM2|PP5m	VUS	Downgrade
99352	105241	Deletion	NM_000350	Pathogenic	criteria_provided,_multiple_submitters,_no_conflicts	splicing_variant	LOF	PVS1|PP5m	LP	intron_variant	PP3|PP3|PP5m	VUS	Downgrade
1032776	1019098	Duplication	NM_001854	Pathogenic	criteria_provided,_multiple_submitters,_no_conflicts	splicing_variant	LOF	PVS1|PM2|PP5m	P	intron_variant	PP3|PM2|PP5m	VUS	Downgrade
206892	201619	Duplication	NM_001165963	Pathogenic	criteria_provided,_multiple_submitters,_no_conflicts	splicing_variant	LOF	PVS1|PM2|PP5m	P	intron_variant	PP3|PM2|PP5m	VUS	Downgrade
189967	187874	single nucleotide variant	NM_001165963	Pathogenic	criteria_provided,_multiple_submitters,_no_conflicts	splicing_variant	LOF	PVS1|PM2|PP5m	P	synonymous_variant	PP3|PM2|PP5m	VUS	Downgrade
654352	650894	Microsatellite	NM_001165963	Pathogenic	criteria_provided,_multiple_submitters,_no_conflicts	splicing_variant	LOF	PVS1|PP5m	LP	intron_variant	PP3|PP5m	VUS	Downgrade
438052	431648	Microsatellite	NM_201548	Pathogenic	criteria_provided,_multiple_submitters,_no_conflicts	splicing_variant	LOF	PVS1|PP5m	LP	intron_variant	PP3|PP5m	VUS	Downgrade
562353	553537	single nucleotide variant	NM_000092	Likely_pathogenic	criteria_provided,_multiple_submitters,_no_conflicts	splicing_variant	LOF	PVS1|PM2|PP5m	P	intron_variant	PP3|PM2|PP5m	VUS	Downgrade
2452051	2426691	Insertion	NM_000249	Likely_pathogenic	criteria_provided,_multiple_submitters,_no_conflicts	splicing_variant	LOF	PVS1|PM2|PP5m	P	inframe_variant	PM4|PM2|PP5m	LP	No change
1345472	1443438	single nucleotide variant	NM_000158	Likely_pathogenic	criteria_provided,_multiple_submitters,_no_conflicts	splicing_variant	LOF	PVS1|PM2|PP5m	P	intron_variant	PM2|PP5m	VUS	Downgrade
633321	621179	single nucleotide variant	NM_001386140	Pathogenic	criteria_provided,_multiple_submitters,_no_conflicts	nonsense	LOF	PVS1|PM2|PP5m	P	-NA-	PP3|PM2|PP5m	VUS	Downgrade
2154056	1892832	Duplication	NM_001386140	Pathogenic	criteria_provided,_multiple_submitters,_no_conflicts	frameshift_variant	LOF	PVS1|PM2|PP5m	P	-NA-	PM2|PP5m	VUS	Downgrade
1072850	1060098	Duplication	NM_001386140	Pathogenic	criteria_provided,_multiple_submitters,_no_conflicts	frameshift_variant	LOF	PVS1|PM2|PP5m	P	-NA-	PP3|PM2|PP5m	VUS	Downgrade
1028159	1016455	single nucleotide variant	NM_001386140	Likely_pathogenic	criteria_provided,_multiple_submitters,_no_conflicts	splicing_variant	LOF	PVS1|PM2|PP5m	P	-NA-	PP3|PM2|PP5m	VUS	Downgrade
435905	428330	Microsatellite	NM_001386140	Pathogenic	criteria_provided,_multiple_submitters,_no_conflicts	frameshift_variant	LOF	PVS1|PP5m	LP	-NA-	PP5m	VUS	Downgrade
955246	944153	Deletion	NM_001386140	Pathogenic	criteria_provided,_multiple_submitters,_no_conflicts	frameshift_variant	LOF	PVS1|PP5m	LP	-NA-	PP5m	VUS	Downgrade
1385779	1460927	Duplication	NM_001386140	Pathogenic	criteria_provided,_multiple_submitters,_no_conflicts	frameshift_variant	LOF	PVS1|PM2|PP5m	P	-NA-	PM2|PP5m	VUS	Downgrade
983772	971864	single nucleotide variant	NM_001386140	Likely_pathogenic	criteria_provided,_multiple_submitters,_no_conflicts	nonsense	LOF	PVS1|PM2|PP5m	P	-NA-	PP3|PM2|PP5m	VUS	Downgrade
14235	29274	single nucleotide variant	NM_001386140	Pathogenic	criteria_provided,_multiple_submitters,_no_conflicts	nonsense	LOF	PVS1|PM2|PP5m	P	-NA-	PP3|PM2|PP5m	VUS	Downgrade
638950	651210	single nucleotide variant	NM_001386140	Pathogenic	criteria_provided,_multiple_submitters,_no_conflicts	splicing_variant	LOF	PVS1|PM2|PP5m	P	-NA-	PP3|PM2|PP5m	VUS	Downgrade
646677	651181	single nucleotide variant	NM_001386140	Likely_pathogenic	criteria_provided,_multiple_submitters,_no_conflicts	splicing_variant	LOF	PVS1|PM2|PP5m	P	-NA-	PP3|PM2|PP5m	VUS	Downgrade
1068931	1060100	Deletion	NM_001386140	Pathogenic	criteria_provided,_multiple_submitters,_no_conflicts	frameshift_variant	LOF	PVS1|PP5m	LP	-NA-	PP3|PP5m	VUS	Downgrade
495776	487115	Deletion	NM_001386140	Pathogenic	criteria_provided,_multiple_submitters,_no_conflicts	frameshift_variant	LOF	PVS1|PP5m	LP	-NA-	PP5m	VUS	Downgrade
956573	944155	single nucleotide variant	NM_001386140	Pathogenic	criteria_provided,_multiple_submitters,_no_conflicts	nonsense	LOF	PVS1|PM2|PP5m	P	-NA-	PP3|PM2|PP5m	VUS	Downgrade
14243	29282	single nucleotide variant	NM_001386140	Pathogenic	criteria_provided,_multiple_submitters,_no_conflicts	nonsense	LOF	PVS1|PM2|PP5m	P	-NA-	PP3|PM2|PP5m	VUS	Downgrade
1062642	1044355	Deletion	NM_004370	Pathogenic	criteria_provided,_multiple_submitters,_no_conflicts	splicing_variant	LOF	PVS1|PP5m	LP	intron_variant	PP3|PP5m	VUS	Downgrade
430079	421603	Microsatellite	NM_017934	Likely_pathogenic	criteria_provided,_multiple_submitters,_no_conflicts	splicing_variant	LOF	PVS1|PP5m	LP	intron_variant	PP3|PP5m	VUS	Downgrade
2571663	2736611	Deletion	NM_000162	Likely_pathogenic	reviewed_by_expert_panel	frameshift_variant	LOF	PVS1|PM1|PP5vs	P	stop_lost	PM4|PM1|PP5m	LP	No change
1405328	1484125	single nucleotide variant	NM_001395413	Pathogenic	criteria_provided,_multiple_submitters,_no_conflicts	splicing_variant	LOF	PVS1|PP5m|BS2	LP	-NA-	PP3|PP5m|BS2	VUS	Downgrade
1324955	1315218	single nucleotide variant	NM_001395413	Pathogenic	criteria_provided,_multiple_submitters,_no_conflicts	nonsense	LOF	PVS1|PP5m|BS2	LP	-NA-	PP3|PP5m|BS2	VUS	Downgrade
1454425	1444768	single nucleotide variant	NM_001395413	Pathogenic	criteria_provided,_multiple_submitters,_no_conflicts	nonsense	LOF	PVS1|PM2|PP5m	P	-NA-	PP3|PM2|PP5m	VUS	Downgrade
590717	581356	Microsatellite	NM_194454	Pathogenic	criteria_provided,_multiple_submitters,_no_conflicts	splicing_variant	LOF	PVS1|PP5m	LP	intron_variant	PP3|PP5m	VUS	Downgrade
43506	52676	Duplication	NM_000441	Pathogenic	criteria_provided,_multiple_submitters,_no_conflicts	splicing_variant	LOF	PVS1|PM2|PP5m	P	intron_variant	PM2|PP3|PP5m	VUS	Downgrade
802370	790698	Duplication	NM_020632	Pathogenic	criteria_provided,_multiple_submitters,_no_conflicts	splicing_variant	LOF	PVS1|PM2|PP5m	P	intron_variant	PP3|PM2|PP3|PP5m	VUS	Downgrade
76757	87648	single nucleotide variant	NM_014141	Pathogenic	criteria_provided,_multiple_submitters,_no_conflicts	nonsense	LOF	PVS1|PM2|PP5m	P	unknown	PP3|PM2|PP5m	VUS	Downgrade
974852	963146	single nucleotide variant	NM_014141	Likely_pathogenic	criteria_provided,_multiple_submitters,_no_conflicts	nonsense	LOF	PVS1|PM2|PP5m	P	unknown	PP3|PM2|PP5m	VUS	Downgrade
930571	919086	Deletion	NM_014141	Pathogenic	criteria_provided,_multiple_submitters,_no_conflicts	frameshift_variant	LOF	PVS1|PP5m	LP	unknown	PP5m	VUS	Downgrade
205244	202058	single nucleotide variant	NM_014141	Pathogenic	criteria_provided,_multiple_submitters,_no_conflicts	nonsense	LOF	PVS1|PM2|PP5m	P	unknown	PP3|PM2|PP5m	VUS	Downgrade
468417	457019	Microsatellite	NM_014141	Pathogenic	criteria_provided,_multiple_submitters,_no_conflicts	nonsense	LOF	PVS1|PP5m	LP	unknown	PP5m	VUS	Downgrade
1785929	1850186	single nucleotide variant	NM_014141	Pathogenic	criteria_provided,_multiple_submitters,_no_conflicts	nonsense	LOF	PVS1|PM2|PP5m	P	unknown	PP3|PM2|PP5m	VUS	Downgrade
95560	101458	single nucleotide variant	NM_014141	Pathogenic	criteria_provided,_multiple_submitters,_no_conflicts	nonsense	LOF	PVS1|PM2|PP5m	P	unknown	PP3|PM2|PP5m	VUS	Downgrade
536312	522746	Deletion	NM_014141	Pathogenic	criteria_provided,_multiple_submitters,_no_conflicts	frameshift_variant	LOF	PVS1|PP5m	LP	unknown	PP5m	VUS	Downgrade
1075757	1061034	single nucleotide variant	NM_014141	Pathogenic	criteria_provided,_multiple_submitters,_no_conflicts	nonsense	LOF	PVS1|PM2|PP5m	P	unknown	PP3|PM2|PP5m	VUS	Downgrade
845872	833299	single nucleotide variant	NM_014141	Pathogenic	criteria_provided,_multiple_submitters,_no_conflicts	nonsense	LOF	PVS1|PM2|PP5m	P	unknown	PP3|PM2|PP5m	VUS	Downgrade
1163876	1152256	single nucleotide variant	NM_014141	Pathogenic	criteria_provided,_multiple_submitters,_no_conflicts	nonsense	LOF	PVS1|PM2|PP5m	P	unknown	PP3|PM2|PP5m	VUS	Downgrade
810206	795983	single nucleotide variant	NM_014141	Pathogenic	criteria_provided,_multiple_submitters,_no_conflicts	nonsense	LOF	PVS1|PM2|PP5m	P	unknown	PP3|PM2|PP5m	VUS	Downgrade
5490	20529	Deletion	NM_014141	Pathogenic	criteria_provided,_multiple_submitters,_no_conflicts	frameshift_variant	LOF	PVS1|PP5m	LP	unknown	PP3|PP5m	VUS	Downgrade
585306	576352	single nucleotide variant	NM_022124	Pathogenic	criteria_provided,_multiple_submitters,_no_conflicts	splicing_variant	LOF	PVS1|PM2|PP5m	P	missense_variant	PP3|PM2|PP5m	VUS	Downgrade
855788	852556	single nucleotide variant	NM_022124	Likely_pathogenic	criteria_provided,_multiple_submitters,_no_conflicts	splicing_variant	LOF	PVS1|PM2|PP5m	P	synonymous_variant	PP3|PM2|PP5m	VUS	Downgrade
12436	27475	single nucleotide variant	NM_003282	Pathogenic	criteria_provided,_multiple_submitters,_no_conflicts	nonsense	LOF	PVS1|PM2|PP5m	P	unknown	PP3|PM2|PP5m	VUS	Downgrade
253221	247639	Duplication	NM_000218	Pathogenic	criteria_provided,_multiple_submitters,_no_conflicts	frameshift_variant	LOF	PVS1|PM1|PM2|PP5m	P	stop_lost	PM4|PM1|PM2|PP5m	LP	No change
519537	510273	Deletion	NM_000218	Pathogenic	criteria_provided,_multiple_submitters,_no_conflicts	frameshift_variant	LOF	PVS1|PM1|PP5m	P	stop_lost	PM4|PM1|PP5m	LP	No change
53069	67737	Duplication	NM_000218	Pathogenic	criteria_provided,_multiple_submitters,_no_conflicts	frameshift_variant	LOF	PVS1|PM1|PM2|PP5m	P	stop_lost	PM4|PM1|PM2|PP5m	LP	No change
817323	805681	Deletion	NM_000218	Pathogenic	criteria_provided,_multiple_submitters,_no_conflicts	frameshift_variant	LOF	PVS1|PM1|PP5m	P	stop_lost	PM4|PM1|PP5m	LP	No change
53072	67740	Deletion	NM_000218	Pathogenic	criteria_provided,_multiple_submitters,_no_conflicts	frameshift_variant	LOF	PVS1|PM1|PP5m	P	stop_lost	PM4|PP3|PM1|PP5m	LP	No change
53076	67744	Deletion	NM_000218	Pathogenic	criteria_provided,_multiple_submitters,_no_conflicts	frameshift_variant	LOF	PVS1|PM1|PP5m	P	stop_lost	PM4|PM1|PP5m	LP	No change
817280	805682	Duplication	NM_000218	Pathogenic	criteria_provided,_multiple_submitters,_no_conflicts	frameshift_variant	LOF	PVS1|PM1|PM2|PP5m	P	stop_lost	PM4|PM1|PM2|PP5m	LP	No change
570590	567160	Deletion	NM_000218	Pathogenic	criteria_provided,_multiple_submitters,_no_conflicts	frameshift_variant	LOF	PVS1|PM1|PP5m	P	stop_lost	PM4|PM1|PP5m	LP	No change
405262	398466	Deletion	NM_000218	Pathogenic	criteria_provided,_multiple_submitters,_no_conflicts	frameshift_variant	LOF	PVS1|PM1|PP5m	P	stop_lost	PM4|PM1|PP5m	LP	No change
1452627	1364346	Duplication	NM_000218	Pathogenic	criteria_provided,_multiple_submitters,_no_conflicts	frameshift_variant	LOF	PVS1|PM1|PM2|PP5m	P	stop_lost	PM4|PM1|PM2|PP5m	LP	No change
53107	67775	Deletion	NM_000218	Pathogenic	criteria_provided,_multiple_submitters,_no_conflicts	frameshift_variant	LOF	PVS1|PM1|PP5m	P	stop_lost	PM4|PP3|PM1|PP5m	LP	No change
53119	67787	Deletion	NM_000218	Pathogenic	criteria_provided,_multiple_submitters,_no_conflicts	frameshift_variant	LOF	PVS1|PM1|PP5m	P	stop_lost	PM4|PM1|PP5m	LP	No change
1457672	1393612	Deletion	NM_000218	Pathogenic	criteria_provided,_multiple_submitters,_no_conflicts	frameshift_variant	LOF	PVS1|PM1|PP5m	P	stop_lost	PM4|PM1|PP5m	LP	No change
53153	67821	Microsatellite	NM_000218	Pathogenic	criteria_provided,_multiple_submitters,_no_conflicts	frameshift_variant	LOF	PVS1|PM1|PP5m	P	stop_lost	PM4|PP3|PM1|PP5m	LP	No change
52962	67630	Deletion	NM_000218	Pathogenic	criteria_provided,_multiple_submitters,_no_conflicts	frameshift_variant	LOF	PVS1|PM1|PP5m	P	stop_lost	PM4|PM1|PP5m	LP	No change
52972	67640	Duplication	NM_000218	Pathogenic	criteria_provided,_multiple_submitters,_no_conflicts	frameshift_variant	LOF	PVS1|PM1|PP5m|BS2	P	stop_lost	PM4|PM1|PP5m|BS2	LP	No change
1179766	1169455	Duplication	NM_000218	Pathogenic	criteria_provided,_multiple_submitters,_no_conflicts	frameshift_variant	LOF	PVS1|PM2|PP5m	P	stop_lost	PM4|PM2|PP5m	LP	No change
52974	67642	Duplication	NM_000218	Pathogenic	criteria_provided,_multiple_submitters,_no_conflicts	frameshift_variant	LOF	PVS1|PM2|PP5m	P	stop_lost	PM4|PM2|PP5m	LP	No change
52973	67641	Deletion	NM_000218	Pathogenic	criteria_provided,_multiple_submitters,_no_conflicts	frameshift_variant	LOF	PVS1|PP5m	LP	stop_lost	PM4|PP3|PP5m	VUS	Downgrade
52978	67646	Duplication	NM_000218	Pathogenic	criteria_provided,_multiple_submitters,_no_conflicts	frameshift_variant	LOF	PVS1|PM1|PM2|PP5m	P	stop_lost	PM4|PP3|PM1|PM2|PP5m	LP	No change
52977	67645	Deletion	NM_000218	Pathogenic	criteria_provided,_multiple_submitters,_no_conflicts	frameshift_variant	LOF	PVS1|PM1|PP5m	P	stop_lost	PM4|PM1|PP5m	LP	No change
922607	911614	Deletion	NM_000218	Pathogenic	criteria_provided,_multiple_submitters,_no_conflicts	frameshift_variant	LOF	PVS1|PM1|PP5m	P	stop_lost	PM4|PM1|PP5m	LP	No change
200884	197486	Deletion	NM_000218	Pathogenic	criteria_provided,_multiple_submitters,_no_conflicts	frameshift_variant	LOF	PVS1|PP5m	LP	stop_lost	PM4|PP5m	VUS	Downgrade
2023188	197494	Deletion	NM_000218	Pathogenic	criteria_provided,_multiple_submitters,_no_conflicts	frameshift_variant	LOF	PVS1|PM1|PP5m	P	stop_lost	PM4|PP3|PM1|PP5m	LP	No change
1171410	1160881	Deletion	NM_000218	Pathogenic	criteria_provided,_multiple_submitters,_no_conflicts	frameshift_variant	LOF	PVS1|PM1|PP5m	P	stop_lost	PM4|PM1|PP5m	LP	No change
1306529	1296472	Duplication	NM_000218	Pathogenic	criteria_provided,_multiple_submitters,_no_conflicts	frameshift_variant	LOF	PVS1|PM1|PM2|PP5m	P	stop_lost	PM4|PM1|PM2|PP5m	LP	No change
53026	67694	Deletion	NM_000218	Pathogenic	criteria_provided,_multiple_submitters,_no_conflicts	frameshift_variant	LOF	PVS1|PM1|PP5m	P	stop_lost	PM4|PM1|PP5m	LP	No change
53025	67693	Deletion	NM_000218	Pathogenic	criteria_provided,_multiple_submitters,_no_conflicts	frameshift_variant	LOF	PVS1|PM1|PP5m	P	stop_lost	PM4|PM1|PP5m	LP	No change
405260	398601	Duplication	NM_000218	Likely_pathogenic	criteria_provided,_multiple_submitters,_no_conflicts	frameshift_variant	LOF	PVS1|PM1|PM2|PP5m	P	stop_lost	PM4|PM1|PM2|PP5m	LP	No change
180925	179329	single nucleotide variant	NM_000256	Pathogenic	criteria_provided,_multiple_submitters,_no_conflicts	splicing_variant	LOF	PVS1|PM2|PP5m	P	missense_variant	PP3|PM2|PP5m	VUS	Downgrade
42511	51681	single nucleotide variant	NM_000256	Pathogenic	criteria_provided,_multiple_submitters,_no_conflicts	splicing_variant	LOF	PVS1|PM2|PP5m	P	intron_variant	PP3|PM2|PP5m	VUS	Downgrade
8619	23658	single nucleotide variant	NM_000256	Pathogenic	criteria_provided,_multiple_submitters,_no_conflicts	splicing_variant	LOF	PVS1|PM2|PP5m	P	intron_variant	PP3|PM2|PP5m	VUS	Downgrade
279971	264553	single nucleotide variant	NM_000256	Pathogenic	criteria_provided,_multiple_submitters,_no_conflicts	splicing_variant	LOF	PVS1|PM2|PP5m	P	intron_variant	PP3|PM2|PP5m	VUS	Downgrade
1066873	1056034	Deletion	NM_001370259	Likely_pathogenic	criteria_provided,_multiple_submitters,_no_conflicts	splicing_variant	LOF	PVS1|PP5m	LP	inframe_variant	PM4|PP5m	VUS	Downgrade
2103421	2158725	Indel	NM_000372	Likely_pathogenic	criteria_provided,_multiple_submitters,_no_conflicts	splicing_variant	LOF	PVS1|PP5m	LP	missense_variant	PP5m	VUS	Downgrade
1301338	1291621	Deletion	NM_001164277	Pathogenic	criteria_provided,_multiple_submitters,_no_conflicts	splicing_variant	LOF	PVS1|PP5m	LP	intron_variant	PP3|PP5m	VUS	Downgrade
1332834	1323552	Duplication	NM_001844	Pathogenic	criteria_provided,_multiple_submitters,_no_conflicts	splicing_variant	LOF	PVS1|PM2|PP5m	P	intron_variant	PM2|PP5m	VUS	Downgrade
102596	108332	Duplication	NM_000277	Pathogenic	criteria_provided,_multiple_submitters,_no_conflicts	frameshift_variant	LOF	PVS1|PM2|PP5m	P	stop_lost	PM4|PP3|PM2|PP5m	LP	No change
102613	108349	Deletion	NM_000277	Likely_pathogenic	reviewed_by_expert_panel	splicing_variant	LOF	PVS1|PM1|PP5vs	P	inframe_variant	PM4|PP3|PM1|PP3|PP5m	LP	No change
812555	800795	Duplication	NM_000059	Pathogenic	reviewed_by_expert_panel	splicing_variant	LOF	PVS1|PM2|PP5vs	P	intron_variant	PM2|PP5m	VUS	Downgrade
267721	262861	Duplication	NM_000059	Pathogenic	criteria_provided,_multiple_submitters,_no_conflicts	splicing_variant	LOF	PVS1|PM2|PP5m	P	intron_variant	PM2|PP5m	VUS	Downgrade
996113	983819	Duplication	NM_000161	Pathogenic	criteria_provided,_multiple_submitters,_no_conflicts	splicing_variant	LOF	PVS1|PM2|PP5m	P	intron_variant	PP3|PM2|PP5m	VUS	Downgrade
41281	49705	Microsatellite	NM_025137	Pathogenic	criteria_provided,_multiple_submitters,_no_conflicts	splicing_variant	LOF	PVS1|PP5m	LP	intron_variant	PP3|PP5m	VUS	Downgrade
636961	624801	Deletion	NM_000138	Likely_pathogenic	reviewed_by_expert_panel	splicing_variant	LOF	PVS1|PP5vs	P	intron_variant	PP3|PP5m	VUS	Downgrade
375746	362629	Deletion	NM_000517	Pathogenic	criteria_provided,_multiple_submitters,_no_conflicts	splicing_variant	LOF	PVS1|PP5m	LP	inframe_variant	PM4|PP3|PP5m	VUS	Downgrade
1048833	1038385	Deletion	NM_000558	Likely_pathogenic	criteria_provided,_multiple_submitters,_no_conflicts	splicing_variant	LOF	PVS1|PP5m	LP	inframe_variant	PM4|PP3|PP5m	VUS	Downgrade
265490	260133	Deletion	NM_001127464	Pathogenic	criteria_provided,_multiple_submitters,_no_conflicts	frameshift_variant	LOF	PVS1|PP5m	LP	-NA-	PP5m	VUS	Downgrade
239501	242530	Deletion	NM_003119	Pathogenic	criteria_provided,_multiple_submitters,_no_conflicts	splicing_variant	LOF	PVS1|PP5m	LP	inframe_variant	PM4|PP5m	VUS	Downgrade
635668	623562	Deletion	NM_000458	Pathogenic	criteria_provided,_multiple_submitters,_no_conflicts	splicing_variant	LOF	PVS1|PP5m	LP	intron_variant	PP3|PP5m	VUS	Downgrade
1879044	1935793	Deletion	NM_000419	Likely_pathogenic	reviewed_by_expert_panel	splicing_variant	LOF	PVS1|PP5vs	LP	intron_variant	PP3|PP5m	VUS	Downgrade
128174	133631	Duplication	NM_032043	Pathogenic	criteria_provided,_multiple_submitters,_no_conflicts	splicing_variant	LOF	PVS1|PP5m|BS2	LP	intron_variant	PP3|PP5m|BS2	VUS	Downgrade
12675	27714	Microsatellite	NM_002734	Pathogenic	criteria_provided,_multiple_submitters,_no_conflicts	splicing_variant	LOF	PVS1|PP5m	LP	intron_variant	PP5m	VUS	Downgrade
1454764	1445102	Duplication	NM_000271	Pathogenic	criteria_provided,_multiple_submitters,_no_conflicts	splicing_variant	LOF	PVS1|PM2|PP5m	P	intron_variant	PM2|PP3|PP5m	VUS	Downgrade
1422567	1416338	Deletion	NM_002085	Pathogenic	criteria_provided,_multiple_submitters,_no_conflicts	nonsense	LOF	PVS1|PP5m	LP	unknown	PP3|PP5m	VUS	Downgrade
88866	94435	Deletion	NM_001031726	Pathogenic	criteria_provided,_multiple_submitters,_no_conflicts	splicing_variant	LOF	PVS1|PM4|PP5m	LP	inframe_variant	PM4|PP3|PP5m	VUS	Downgrade
1334748	1325642	single nucleotide variant	NM_001386298	Likely_pathogenic	criteria_provided,_multiple_submitters,_no_conflicts	nonsense	LOF	PVS1|PM2|PP5m	P	-NA-	PP3|PM2|PP5m	VUS	Downgrade
1068017	1056583	single nucleotide variant	NM_001386298	Likely_pathogenic	criteria_provided,_multiple_submitters,_no_conflicts	splicing_variant	LOF	PVS1|PM2|PP5m	P	-NA-	PP3|PM2|PP5m	VUS	Downgrade
1064629	1052876	single nucleotide variant	NM_001386298	Pathogenic	criteria_provided,_multiple_submitters,_no_conflicts	splicing_variant	LOF	PVS1|PM2|PP5m	P	-NA-	PP3|PM2|PP5m	VUS	Downgrade
1030471	1018588	single nucleotide variant	NM_001386298	Pathogenic	criteria_provided,_multiple_submitters,_no_conflicts	nonsense	LOF	PVS1|PM2|PP5m	P	-NA-	PP3|PM2|PP5m	VUS	Downgrade
1030294	1018695	single nucleotide variant	NM_001386393	Pathogenic	criteria_provided,_multiple_submitters,_no_conflicts	splicing_variant	LOF	PVS1|PM2|PP5m	P	-NA-	PP3|PM2|PP5m	VUS	Downgrade
652533	653126	single nucleotide variant	NM_001386393	Likely_pathogenic	criteria_provided,_multiple_submitters,_no_conflicts	splicing_variant	LOF	PVS1|PM2|PP5m	P	-NA-	PP3|PM2|PP5m	VUS	Downgrade
4559	19598	single nucleotide variant	NM_001386393	Pathogenic	criteria_provided,_multiple_submitters,_no_conflicts	splicing_variant	LOF	PVS1|PM2|PP5m	P	-NA-	PP3|PM2|PP5m	VUS	Downgrade
417999	410756	Microsatellite	NM_000022	Likely_pathogenic	criteria_provided,_multiple_submitters,_no_conflicts	splicing_variant	LOF	PVS1|PP5m	LP	intron_variant	PP3|PP5m	VUS	Downgrade
644680	650422	Duplication	NM_172107	Pathogenic	criteria_provided,_multiple_submitters,_no_conflicts	frameshift_variant	LOF	PVS1|PM2|PP5m	P	stop_lost	PM4|PM2|PP5m	LP	No change
216652	213482	Deletion	NM_007194	Pathogenic	criteria_provided,_multiple_submitters,_no_conflicts	splicing_variant	LOF	PVS1|PP5m	LP	intron_variant	PP3|PP5m	VUS	Downgrade
373766	360508	single nucleotide variant	NM_033517	Pathogenic	criteria_provided,_multiple_submitters,_no_conflicts	nonsense	LOF	PVS1|PM2|PP5m	P	-NA-	PP3|PM2|PP5m	VUS	Downgrade
208759	205325	Duplication	NM_033517	Pathogenic	criteria_provided,_multiple_submitters,_no_conflicts	frameshift_variant	LOF	PVS1|PM2|PP5m	P	-NA-	PP3|PM2|PP5m	VUS	Downgrade
436718	430597	Deletion	NM_033517	Pathogenic	criteria_provided,_multiple_submitters,_no_conflicts	frameshift_variant	LOF	PVS1|PP5m	LP	-NA-	PP5m	VUS	Downgrade
497147	488571	Duplication	NM_004006	Pathogenic	criteria_provided,_multiple_submitters,_no_conflicts	splicing_variant	LOF	PVS1|PM2|PP5m	P	intron_variant	PM2|PP3|PP5m	VUS	Downgrade
496942	488366	Indel	NM_001378477	Pathogenic	criteria_provided,_multiple_submitters,_no_conflicts	splicing_variant	LOF	PVS1|PP5m	LP	missense_variant	PP5m	VUS	Downgrade
1456164	1458104	Deletion	NM_033380	Pathogenic	criteria_provided,_multiple_submitters,_no_conflicts	frameshift_variant	LOF	PVS1|PM1|PP5m	P	unknown	PM1|PP5m	VUS	Downgrade
587321	578063	Deletion	NM_033380	Pathogenic	criteria_provided,_multiple_submitters,_no_conflicts	frameshift_variant	LOF	PVS1|PP5m	LP	unknown	PP5m	VUS	Downgrade
24302	35643	Deletion	NM_033380	Pathogenic	criteria_provided,_multiple_submitters,_no_conflicts	frameshift_variant	LOF	PVS1|PM1|PP5m	P	unknown	PM1|PP5m	VUS	Downgrade
587259	578084	Microsatellite	NM_033380	Pathogenic	criteria_provided,_multiple_submitters,_no_conflicts	frameshift_variant	LOF	PVS1|PP5m	LP	unknown	PP5m	VUS	Downgrade
24325	35666	single nucleotide variant	NM_033380	Pathogenic	criteria_provided,_multiple_submitters,_no_conflicts	nonsense	LOF	PVS1|PM1|PM2|PP5m	P	unknown	PP3|PM1|PM2|PP5m	LP	No change
447214	442368	Deletion	NM_033380	Pathogenic	criteria_provided,_multiple_submitters,_no_conflicts	frameshift_variant	LOF	PVS1|PM1|PP5m	P	unknown	PM1|PP5m	VUS	Downgrade
24367	35708	single nucleotide variant	NM_033380	Pathogenic	criteria_provided,_multiple_submitters,_no_conflicts	nonsense	LOF	PVS1|PM1|PM2|PP5m	P	unknown	PP3|PM1|PM2|PP5m	LP	No change
24442	35783	single nucleotide variant	NM_033380	Pathogenic	criteria_provided,_multiple_submitters,_no_conflicts	nonsense	LOF	PVS1|PM1|PM2|PP5m	P	unknown	PP3|PM1|PM2|PP5m	LP	No change
829955	818353	single nucleotide variant	NM_033380	Pathogenic	criteria_provided,_multiple_submitters,_no_conflicts	nonsense	LOF	PVS1|PM1|PM2|PP5m	P	unknown	PP3|PM1|PM2|PP5m	LP	No change
24482	35823	Deletion	NM_033380	Pathogenic	criteria_provided,_multiple_submitters,_no_conflicts	frameshift_variant	LOF	PVS1|PM1|PP5m	P	unknown	PM1|PP5m	VUS	Downgrade
977198	965337	Deletion	NM_033380	Pathogenic	criteria_provided,_multiple_submitters,_no_conflicts	frameshift_variant	LOF	PVS1|PM1|PP5m	P	unknown	PM1|PP5m	VUS	Downgrade
450980	446466	Deletion	NM_033380	Pathogenic	criteria_provided,_multiple_submitters,_no_conflicts	frameshift_variant	LOF	PVS1|PM1|PP5m	P	unknown	PM1|PP5m	VUS	Downgrade
1459457	1484648	single nucleotide variant	NM_033380	Pathogenic	criteria_provided,_multiple_submitters,_no_conflicts	nonsense	LOF	PVS1|PM1|PM2|PP5m	P	unknown	PP3|PM1|PM2|PP5m	LP	No change
1300189	1290474	single nucleotide variant	NM_033380	Pathogenic	criteria_provided,_multiple_submitters,_no_conflicts	nonsense	LOF	PVS1|PM1|PM2|PP5m	P	unknown	PP3|PM1|PM2|PP5m	LP	No change
24599	35940	single nucleotide variant	NM_033380	Pathogenic	criteria_provided,_multiple_submitters,_no_conflicts	nonsense	LOF	PVS1|PM1|PM2|PP5m	P	unknown	PP3|PM1|PM2|PP5m	LP	No change
585542	577921	Deletion	NM_033380	Pathogenic	criteria_provided,_multiple_submitters,_no_conflicts	frameshift_variant	LOF	PVS1|PP5m	LP	unknown	PP5m	VUS	Downgrade
974430	962815	single nucleotide variant	NM_033380	Pathogenic	criteria_provided,_multiple_submitters,_no_conflicts	nonsense	LOF	PVS1|PM1|PM2|PP5m	P	unknown	PP3|PM1|PM2|PP5m	LP	No change
1075985	1065137	Duplication	NM_033380	Pathogenic	criteria_provided,_multiple_submitters,_no_conflicts	frameshift_variant	LOF	PVS1|PM2|PP5m	P	unknown	PM2|PP5m	VUS	Downgrade
585543	577922	Deletion	NM_033380	Pathogenic	criteria_provided,_multiple_submitters,_no_conflicts	frameshift_variant	LOF	PVS1|PP5m	LP	unknown	PP5m	VUS	Downgrade
1350803	1492391	single nucleotide variant	NM_033380	Pathogenic	criteria_provided,_multiple_submitters,_no_conflicts	nonsense	LOF	PVS1|PM2|PP5m	P	unknown	PP3|PM2|PP5m	VUS	Downgrade
984065	972394	single nucleotide variant	NM_033380	Likely_pathogenic	criteria_provided,_multiple_submitters,_no_conflicts	nonsense	LOF	PVS1|PM2|PP5m	P	unknown	PP3|PM2|PP5m	VUS	Downgrade
447210	442382	Deletion	NM_033380	Pathogenic	criteria_provided,_multiple_submitters,_no_conflicts	frameshift_variant	LOF	PVS1|PM1|PP5m	P	unknown	PM1|PP5m	VUS	Downgrade
585544	577923	Deletion	NM_033380	Pathogenic	criteria_provided,_multiple_submitters,_no_conflicts	frameshift_variant	LOF	PVS1|PP5m	LP	unknown	PP5m	VUS	Downgrade
637042	624871	Deletion	NM_033380	Pathogenic	criteria_provided,_multiple_submitters,_no_conflicts	frameshift_variant	LOF	PVS1|PM1|PP5m	P	unknown	PM1|PP5m	VUS	Downgrade
811258	800209	Deletion	NM_033380	Pathogenic	criteria_provided,_multiple_submitters,_no_conflicts	frameshift_variant	LOF	PVS1|PP5m	LP	unknown	PP5m	VUS	Downgrade
984067	972396	single nucleotide variant	NM_033380	Pathogenic	criteria_provided,_multiple_submitters,_no_conflicts	nonsense	LOF	PVS1|PM2|PP5m	P	unknown	PP3|PM2|PP5m	VUS	Downgrade
24755	36096	single nucleotide variant	NM_033380	Pathogenic	criteria_provided,_multiple_submitters,_no_conflicts	nonsense	LOF	PVS1|PM2|PP5m	P	unknown	PP3|PM2|PP5m	VUS	Downgrade
829935	818367	Microsatellite	NM_033380	Pathogenic	criteria_provided,_multiple_submitters,_no_conflicts	frameshift_variant	LOF	PVS1|PM1|PP5m	P	unknown	PM1|PP5m	VUS	Downgrade
860456	849556	single nucleotide variant	NM_033380	Pathogenic	criteria_provided,_multiple_submitters,_no_conflicts	nonsense	LOF	PVS1|PM1|PM2|PP5m	P	unknown	PP3|PM1|PM2|PP5m	LP	No change
24785	36126	single nucleotide variant	NM_033380	Pathogenic	criteria_provided,_multiple_submitters,_no_conflicts	nonsense	LOF	PVS1|PM1|PM2|PP5m	P	unknown	PP3|PM1|PM2|PP5m	LP	No change
24786	36127	single nucleotide variant	NM_033380	Pathogenic	criteria_provided,_multiple_submitters,_no_conflicts	nonsense	LOF	PVS1|PM1|PM2|PP5m	P	unknown	PP3|PM1|PM2|PP5m	LP	No change
44442	53609	Deletion	NM_002294	Pathogenic	criteria_provided,_multiple_submitters,_no_conflicts	splicing_variant	LOF	PVS1|PP5m	LP	intron_variant	PP3|PP5m	VUS	Downgrade
213498	210455	Deletion	NM_001110556	Pathogenic	criteria_provided,_multiple_submitters,_no_conflicts	frameshift_variant	LOF	PVS1|PP5m	LP	stop_lost	PM4|PP5m	VUS	Downgrade
767317	777088	Duplication	NM_172362	Benign	criteria_provided,_multiple_submitters,_no_conflicts	splicing_variant	LOF	PVS1|BS2|BP6-strong	B	intron_variant	PP3|BS2|BP6-strong	B	No change
515844	500068	Duplication	NM_001330078	Likely_benign	criteria_provided,_multiple_submitters,_no_conflicts	splicing_variant	LOF	PVS1|BS2|BP6-strong	B	intron_variant	PP3|BS2|BP6-strong	B	No change
1235647	1226027	Microsatellite	NM_024753	Benign	criteria_provided,_multiple_submitters,_no_conflicts	splicing_variant	LOF	PVS1|BA1|BP6-strong	B	intron_variant	BA1|BP6-strong	B	No change
770913	777472	Duplication	NM_004134	Benign	criteria_provided,_multiple_submitters,_no_conflicts	splicing_variant	LOF	PVS1|BS2|BP6-strong	B	intron_variant	BS2|BP6-strong	B	No change
782466	779101	Duplication	NM_016222	Benign	criteria_provided,_multiple_submitters,_no_conflicts	splicing_variant	LOF	PVS1|BS2|BP6-strong	B	intron_variant	BS2|BP6-strong	B	No change
493449	486412	Duplication	NM_003730	Benign	criteria_provided,_multiple_submitters,_no_conflicts	splicing_variant	LOF	PVS1|BS2|BP6-strong	B	intron_variant	BS2|BP6-strong	B	No change
591286	582279	Microsatellite	NR_178195	Benign	criteria_provided,_multiple_submitters,_no_conflicts	nonsense	LOF	PVS1|BA1|BP6-strong	B	-NA-	BA1|BP6-strong	B	No change
415748	396740	Insertion	NM_019892	Likely_benign	criteria_provided,_multiple_submitters,_no_conflicts	splicing_variant	LOF	PVS1|BS2|BP6-strong	B	intron_variant	BS2|BP6-strong	B	No change
215526	212658	Insertion	NM_019892	Benign	criteria_provided,_multiple_submitters,_no_conflicts	splicing_variant	LOF	PVS1|BA1|BP6-strong	B	intron_variant	BA1|BP6-strong	B	No change
695325	685252	Insertion	NM_019892	Benign	criteria_provided,_multiple_submitters,_no_conflicts	splicing_variant	LOF	PVS1|BS2|BP6-strong	B	intron_variant	BS2|BP6-strong	B	No change
372049	358869	Duplication	NM_006231	Likely_benign	criteria_provided,_multiple_submitters,_no_conflicts	splicing_variant	LOF	PVS1|BS2|BP6-strong	B	intron_variant	BS2|BP6-strong	B	No change
240462	241405	Duplication	NM_006231	Benign	criteria_provided,_multiple_submitters,_no_conflicts	splicing_variant	LOF	PVS1|BS2|BP6-strong	B	intron_variant	BS2|BP6-strong	B	No change
726266	739835	single nucleotide variant	NM_020778	Benign	criteria_provided,_multiple_submitters,_no_conflicts	nonsense	LOF	PVS1|BS2|BP6-strong	B	genic_upstream_transcript_variant	PP3|BS2|BP6-strong	B	No change
540281	530443	Microsatellite	NM_004960	Benign	criteria_provided,_multiple_submitters,_no_conflicts	splicing_variant	LOF	PVS1|BP6-strong	LB	inframe_variant	PM4|PP3|BP6-strong	LB	No change
1637950	1559854	Microsatellite	NM_006949	Benign	criteria_provided,_multiple_submitters,_no_conflicts	splicing_variant	LOF	PVS1|BS2|BP6-strong	B	intron_variant	BS2|BP6-strong	B	No change
206428	203581	Duplication	NM_007254	Likely_benign	criteria_provided,_multiple_submitters,_no_conflicts	splicing_variant	LOF	PVS1|BS2|BP6-strong	B	intron_variant	BS2|BP6-strong	B	No change
156059	165855	Microsatellite	NM_001110792	Likely_benign	reviewed_by_expert_panel	splicing_variant	LOF	PVS1|BP6-vs	B	intron_variant	BP6-vs	B	No change

## Sheet: ANNOVAR_PVS1-loss_summary
PVS1-loss
ClinVar LoF	31640
ANNOVAR inconsistant with ClinVar	532
ClinVar LoF and ANNOVAR not LoF	185
ClinVar LoF and ANNOVAR not LoF and no conflict	184
	ClinVar_Curated_Classes
ANNOVAR_Curated_Classes	P	LP	LB	B	All
no change	43	0	16	1	60
downgrade	77	47	0	0	124
SUM	120	47	16	1	184

## Sheet: ANNOVAR_PVS1-gain no conflict
VariationID	AlleleID	Type	NM	ClinVar_CLNSIG	ClinVar_CLNREVSTAT	ClinVar_Coding_impact	ClinVar_Category	ACMG_rule_ClinVar_coding_impact	ClinVar_Curated_Classes	ANNOVAR_coding_impact	ACMG_rule_ANNOVAR_coding_impact	ANNOVAR_Curated_Classes	Grade_Change
1167800	1153584	Microsatellite	NM_001852	Benign	criteria_provided,_multiple_submitters,_no_conflicts	intron_variant	Others	BS1|BS2|BP6-strong	B	splicing_variant	PVS1|BS1|BS2|BP6-strong	B	Nochange
90843	96318	Duplication	NM_000251	Likely_benign	reviewed_by_expert_panel	intron_variant	Others	BS2|BP6-vs	B	splicing_variant	PVS1|BS2|BP6-strong	B	Nochange
142961	152675	Duplication	NM_000179	Benign	criteria_provided,_multiple_submitters,_no_conflicts	intron_variant	Others	BS2|BP6-strong	B	splicing_variant	PVS1|BS2|BP6-strong	B	Nochange
331463	284405	Duplication	NM_001164508	Benign	criteria_provided,_multiple_submitters,_no_conflicts	intron_variant	Others	BA1|BP6-strong	B	splicing_variant	PVS1|BA1|BP6-strong	B	Nochange
167661	178058	Duplication	NM_001365536	Benign	criteria_provided,_multiple_submitters,_no_conflicts	intron_variant	Others	BA1|BP6-strong	B	splicing_variant	PVS1|BA1|BP6-strong	B	Nochange
226768	228987	Duplication	NM_053025	Benign	criteria_provided,_multiple_submitters,_no_conflicts	intron_variant	Others	BS1|BS2|BP6-strong	B	splicing_variant	PVS1|BS1|BS2|BP6-strong	B	Nochange
471730	452225	Duplication	NM_053025	Benign	criteria_provided,_multiple_submitters,_no_conflicts	intron_variant	Others	BS2|BP6-strong	B	splicing_variant	PVS1|BS2|BP6-strong	B	Nochange
769316	777635	Duplication	NM_007214	Benign	criteria_provided,_multiple_submitters,_no_conflicts	intron_variant	Others	BA1|BP6-strong	B	splicing_variant	PVS1|BA1|BP6-strong	B	Nochange
287657	271894	Duplication	NM_182961	Benign	criteria_provided,_multiple_submitters,_no_conflicts	intron_variant	Others	BS2|BP6-strong	B	splicing_variant	PVS1|BS2|BP6-strong	B	Nochange
1165165	1155758	Duplication	NM_000722	Benign	criteria_provided,_multiple_submitters,_no_conflicts	intron_variant	Others	BS2|BP6-strong	B	splicing_variant	PVS1|BS2|BP6-strong	B	Nochange
416577	395785	Duplication	NM_000722	Benign	criteria_provided,_multiple_submitters,_no_conflicts	intron_variant	Others	BA1|BP6-strong	B	splicing_variant	PVS1|BA1|BP6-strong	B	Nochange
95210	101110	Duplication	NM_005045	Benign	criteria_provided,_multiple_submitters,_no_conflicts	intron_variant	Others	BS1|BS2|BP6-strong	B	splicing_variant	PVS1|BS1|BS2|BP6-strong	B	Nochange
1605600	1646652	Microsatellite	NM_015450	Likely_benign	criteria_provided,_multiple_submitters,_no_conflicts	intron_variant	Others	BS2|BP6-strong	B	splicing_variant	PVS1|BS2|BP6-strong	B	Nochange
559318	549952	Duplication	NM_152416	Benign	criteria_provided,_multiple_submitters,_no_conflicts	intron_variant	Others	BA1|BP6-strong	B	splicing_variant	PVS1|BA1|BP6-strong	B	Nochange
559317	549951	Duplication	NM_152416	Benign	criteria_provided,_multiple_submitters,_no_conflicts	intron_variant	Others	BS1|BS2|BP6-strong	B	splicing_variant	PVS1|BS1|BS2|BP6-strong	B	Nochange
94124	100024	Duplication	NM_003289	Benign	criteria_provided,_multiple_submitters,_no_conflicts	intron_variant	Others	BA1|BP6-strong	B	splicing_variant	PVS1|BA1|BP6-strong	B	Nochange
94125	100025	Duplication	NM_003289	Benign	criteria_provided,_multiple_submitters,_no_conflicts	intron_variant	Others	BA1|BP6-strong	B	splicing_variant	PVS1|BA1|BP6-strong	B	Nochange
810422	796222	Microsatellite	NM_001114753	Likely_benign	criteria_provided,_multiple_submitters,_no_conflicts	intron_variant	Others	BS2|BP6-strong	B	splicing_variant	PVS1|BS2|BP6-strong	B	Nochange
454310	461343	Duplication	NM_000256	Benign	criteria_provided,_multiple_submitters,_no_conflicts	intron_variant	Others	BS2|BP6-strong	B	splicing_variant	PVS1|BS2|BP6-strong	B	Nochange
718090	730736	Duplication	NM_004397	Benign	criteria_provided,_multiple_submitters,_no_conflicts	intron_variant	Others	BS2|BP6-strong	B	splicing_variant	PVS1|BS2|BP6-strong	B	Nochange
517652	497220	Duplication	NM_004447	Benign	criteria_provided,_multiple_submitters,_no_conflicts	intron_variant	Others	BA1|BP6-strong	B	splicing_variant	PVS1|BA1|BP6-strong	B	Nochange
668707	666471	Duplication	NM_012062	Benign	criteria_provided,_multiple_submitters,_no_conflicts	intron_variant	Others	BS2|BP6-strong	B	splicing_variant	PVS1|BS2|BP6-strong	B	Nochange
786236	779500	Microsatellite	NM_001206999	Benign	criteria_provided,_multiple_submitters,_no_conflicts	intron_variant	Others	BS1|BS2|BP6-strong	B	splicing_variant	PVS1|BS1|BS2|BP6-strong	B	Nochange
1589652	1607674	Duplication	NM_006346	Benign	criteria_provided,_multiple_submitters,_no_conflicts	intron_variant	Others	BA1|BP6-strong	B	splicing_variant	PVS1|BA1|BP6-strong	B	Nochange
1532801	1605356	Duplication	NM_006346	Benign	criteria_provided,_multiple_submitters,_no_conflicts	intron_variant	Others	BS2|BP6-strong	B	splicing_variant	PVS1|BS2|BP6-strong	B	Nochange
414316	400298	Duplication	NM_002471	Benign	criteria_provided,_multiple_submitters,_no_conflicts	intron_variant	Others	BS2|BP6-strong	B	splicing_variant	PVS1|BS2|BP6-strong	B	Nochange
237441	241815	Duplication	NM_000257	Benign	criteria_provided,_multiple_submitters,_no_conflicts	intron_variant	Others	BS2|BP6-strong	B	splicing_variant	PVS1|BS2|BP6-strong	B	Nochange
668319	666583	single nucleotide variant	NM_015915	Likely_benign	criteria_provided,_multiple_submitters,_no_conflicts	intron_variant	Others	BS2|BP6-strong	B	splicing_variant	PVS1|BS2|BP6-strong	B	Nochange
314175	330476	Duplication	NM_005589	Benign	criteria_provided,_multiple_submitters,_no_conflicts	intron_variant	Others	BS1|BS2|BP6-strong	B	splicing_variant	PVS1|BS1|BS2|BP6-strong	B	Nochange
529677	529699	Duplication	NM_021098	Benign	criteria_provided,_multiple_submitters,_no_conflicts	intron_variant	Others	PP3|BS2|BP6-strong	B	splicing_variant	PVS1|BS2|BP6-strong	B	Nochange
465850	468361	Duplication	NM_000080	Likely_benign	criteria_provided,_multiple_submitters,_no_conflicts	intron_variant	Others	PP3|BS2|BP6-strong	B	splicing_variant	PVS1|BS2|BP6-strong	B	Nochange
237546	242666	Duplication	NM_001042492	Benign	criteria_provided,_multiple_submitters,_no_conflicts	intron_variant	Others	PP3|BS2|BP6-strong	B	splicing_variant	PVS1|BS2|BP6-strong	B	Nochange
457825	467885	Duplication	NM_001042492	Benign	criteria_provided,_multiple_submitters,_no_conflicts	intron_variant	Others	PP3|BS2|BP6-strong	B	splicing_variant	PVS1|BS2|BP6-strong	B	Nochange
833799	822277	Duplication	NM_002230	Benign	criteria_provided,_multiple_submitters,_no_conflicts	intron_variant	Others	PP3|BS2|BP6-strong	B	splicing_variant	PVS1|BS2|BP6-strong	B	Nochange
421074	410838	Microsatellite	NM_001958	Likely_benign	criteria_provided,_multiple_submitters,_no_conflicts	intron_variant	Others	BS2|BP6-strong	B	splicing_variant	PVS1|BS2|BP6-strong	B	Nochange
1169946	1159396	Duplication	NM_001018113	Benign	criteria_provided,_multiple_submitters,_no_conflicts	intron_variant	Others	BS2|BP6-strong	B	splicing_variant	PVS1|BS2|BP6-strong	B	Nochange
167060	177703	Microsatellite	NM_001018113	Benign	criteria_provided,_multiple_submitters,_no_conflicts	intron_variant	Others	BS2|BP6-strong	B	splicing_variant	PVS1|BS2|BP6-strong	B	Nochange
251982	246287	Insertion	NM_000527	Pathogenic	criteria_provided,_multiple_submitters,_no_conflicts	intron_variant	Others	PM1|PM2|PP3|PP5m	LP	splicing_variant	PVS1|PM1|PM2|PP5m	P	Nochange

## Sheet: ANNOVAR_PVS1-gain_summary
PVS1-gain
ClinVar not LoF	132909
ANNOVAR inconsistant with ClinVar	1134
ClinVar not LoF and ANNOVAR LoF	74
ClinVar not LoF and ANNOVAR LoF and no conflict	38
	ClinVar_Curated_Classes
ANNOVAR_Curated_Classes	P	LP	LB	B	All
no change	0	1	0	37	38
upgrade	0	0	0	0	0
SUM	0	1	0	37	38

## Sheet: ANNOVAR_PVS1-change summary
ClinVar LoF and ANNOVAR not LoF and no conflict (PVS1-loss)	184
ClinVar not LoF and ANNOVAR LoF and no conflict (PVS1-gain)	38
		ClinVar_Curated_Classes
	ANNOVAR_Curated_Classes	P	LP	LB	B	All
	no change	43	1	16	38	98
	downgrade	77	47	0	0	124
	upgrade	0	0	0	0	0
	SUM	120	48	16	38	222
Note
* no conflict: ClinVar_CLNSIG VS. ClinVar_Curated_Classes
1. BLB>BLB=no conflict
2. PLP>PLP=no conflict
*downgrade or upgrade: ANNOVAR_Curated_Classes VS. ClinVar_Curated_Classes
1. BLB>BLB=no change
2. PLP>PLP=no change
