# Supplementary material for: Toward streamline variant classification: discrepancies in variant nomenclature and syntax for ClinVar pathogenic variants across annotation tools
Source: Hum Genomics. 2025 Jun 21;19:70. doi: 10.1186/s40246-025-00778-x (PMC12181866; doi:10.1186/s40246-025-00778-x)
Supplement: Supplementary file 20 — Additional file 20 [file 40246_2025_778_MOESM20_ESM.xlsx]

## Sheet: SnpEff_PVS1-loss no conflict
VariationID	AlleleID	Type	NM	ClinVar_CLNSIG	ClinVar_CLNREVSTAT	ClinVar_Coding_impact	ClinVar_Category	ACMG_rule_ClinVar_coding_impact	ClinVar_Curated_Classes	SnpEff_coding impact	ACMG_rule_ SnpEff_coding_impact	SnpEff_Curated_Classes	Grade_Change
726266	739835	single nucleotide variant	NM_020778	Benign	criteria_provided,_multiple_submitters,_no_conflicts	nonsense	LOF	PVS1|BS2|BP6-strong	B	genic_upstream_transcript_variant	PP3|BS2|BP6-strong	B	No change
1073210	1059177	Duplication	NM_014140	Pathogenic	criteria_provided,_multiple_submitters,_no_conflicts	splicing_variant	LOF	PVS1|PM2|PP5m	P	intron_variant	PP3|PM2|PP5m	VUS	Downgrade
4392	19431	single nucleotide variant	NM_052995	Pathogenic	criteria_provided,_multiple_submitters,_no_conflicts	nonsense	LOF	PVS1|PP5m|BS2	LP	-NA-	PP3|PP5m|BS2	VUS	Downgrade
56303	70942	Deletion	NM_001080522	Pathogenic	criteria_provided,_multiple_submitters,_no_conflicts	splicing_variant	LOF	PVS1|PP5m	LP	-NA-	PP3|PP5m	VUS	Downgrade
217617	214187	Microsatellite	NM_001378615	Pathogenic	criteria_provided,_multiple_submitters,_no_conflicts	splicing_variant	LOF	PVS1|PP5m	LP	intron_variant	PP3|PP5m	VUS	Downgrade
434014	427228	Deletion	NM_000297	Pathogenic	criteria_provided,_multiple_submitters,_no_conflicts	splicing_variant	LOF	PVS1|PP5m	LP	intron_variant	PP3|PP5m	VUS	Downgrade
88863	94432	Deletion	NM_001010892	Pathogenic	criteria_provided,_multiple_submitters,_no_conflicts	splicing_variant	LOF	PVS1|PP5m	LP	intron_variant	PP3|PP5m	VUS	Downgrade
5604	20643	Duplication	NM_012144	Pathogenic	criteria_provided,_multiple_submitters,_no_conflicts	splicing_variant	LOF	PVS1|PM2|PP5m	P	intron_variant	PP3|PM2|PP5m	VUS	Downgrade
204250	200629	Microsatellite	NM_012203	Pathogenic	criteria_provided,_multiple_submitters,_no_conflicts	splicing_variant	LOF	PVS1|PP5m	LP	intron_variant	PP3|PP5m	VUS	Downgrade
2636357	2804560	Microsatellite	NM_007171	Pathogenic	criteria_provided,_multiple_submitters,_no_conflicts	splicing_variant	LOF	PVS1|PP5m	LP	-NA-	PP3|PP5m	VUS	Downgrade
1184845	1174755	single nucleotide variant	NM_001164277	Pathogenic	criteria_provided,_multiple_submitters,_no_conflicts	nonsense	LOF	PVS1|PM2|PP5m	P	-NA-	PM2|PP3|PP5m	VUS	Downgrade
6934	21973	single nucleotide variant	NM_001164277	Pathogenic	criteria_provided,_multiple_submitters,_no_conflicts	nonsense	LOF	PVS1|PM2|PP5m	P	-NA-	PM2|PP3|PP5m	VUS	Downgrade
928687	917079	single nucleotide variant	NM_001164277	Pathogenic	criteria_provided,_multiple_submitters,_no_conflicts	nonsense	LOF	PVS1|PM2|PP5m	P	-NA-	PM2|PP3|PP5m	VUS	Downgrade
552957	545810	single nucleotide variant	NM_001164277	Likely_pathogenic	criteria_provided,_multiple_submitters,_no_conflicts	splicing_variant	LOF	PVS1|PM2|PP5m	P	-NA-	PM2|PP3|PP5m	VUS	Downgrade
1514493	1485536	single nucleotide variant	NM_001164277	Pathogenic	criteria_provided,_multiple_submitters,_no_conflicts	splicing_variant	LOF	PVS1|PM2|PP5m	P	-NA-	PM2|PP3|PP5m	VUS	Downgrade
583102	564453	single nucleotide variant	NM_001164277	Pathogenic	criteria_provided,_multiple_submitters,_no_conflicts	splicing_variant	LOF	PVS1|PM2|PP5m	P	-NA-	PM2|PP3|PP5m	VUS	Downgrade
6922	21961	single nucleotide variant	NM_001164277	Pathogenic	criteria_provided,_multiple_submitters,_no_conflicts	nonsense	LOF	PVS1|PM2|PP5m	P	-NA-	PM2|PP3|PP5m	VUS	Downgrade
6926	21965	Deletion	NM_001164277	Pathogenic	criteria_provided,_multiple_submitters,_no_conflicts	frameshift_variant	LOF	PVS1|PP5m	LP	-NA-	PP3|PP5m	VUS	Downgrade
551369	545560	single nucleotide variant	NM_001164277	Likely_pathogenic	criteria_provided,_multiple_submitters,_no_conflicts	splicing_variant	LOF	PVS1|PM2|PP5m	P	-NA-	PM2|PP3|PP5m	VUS	Downgrade
2017762	2065403	single nucleotide variant	NM_001164277	Likely_pathogenic	criteria_provided,_multiple_submitters,_no_conflicts	splicing_variant	LOF	PVS1|PM2|PP5m	P	-NA-	PM2|PP3|PP5m	VUS	Downgrade
188762	186807	single nucleotide variant	NM_001164277	Pathogenic	criteria_provided,_multiple_submitters,_no_conflicts	nonsense	LOF	PVS1|PM2|PP5m	P	-NA-	PM2|PP3|PP5m	VUS	Downgrade
189147	186808	single nucleotide variant	NM_001164277	Pathogenic	criteria_provided,_multiple_submitters,_no_conflicts	nonsense	LOF	PVS1|PP5m|BS2	LP	-NA-	PP3|PP5m|BS2	VUS	Downgrade
662747	639767	Deletion	NM_001164277	Pathogenic	criteria_provided,_multiple_submitters,_no_conflicts	frameshift_variant	LOF	PVS1|PP5m	LP	-NA-	PP3|PP5m	VUS	Downgrade
633418	621806	single nucleotide variant	NM_001164277	Pathogenic	criteria_provided,_multiple_submitters,_no_conflicts	splicing_variant	LOF	PVS1|PM2|PP5m	P	-NA-	PM2|PP3|PP5m	VUS	Downgrade
633417	621345	Duplication	NM_001164277	Pathogenic	criteria_provided,_multiple_submitters,_no_conflicts	frameshift_variant	LOF	PVS1|PM2|PP5m	P	-NA-	PM2|PP3|PP5m	VUS	Downgrade
529223	526098	Duplication	NM_001164277	Pathogenic	criteria_provided,_multiple_submitters,_no_conflicts	frameshift_variant	LOF	PVS1|PM2|PP5m	P	-NA-	PM2|PP3|PP5m	VUS	Downgrade
208611	205173	Microsatellite	NM_000231	Pathogenic	criteria_provided,_multiple_submitters,_no_conflicts	splicing_variant	LOF	PVS1|PP5m	LP	intron_variant	PP3|PP5m	VUS	Downgrade
56346	70985	Deletion	NM_001126105	Pathogenic	criteria_provided,_multiple_submitters,_no_conflicts	frameshift_variant	LOF	PVS1|PP5m	LP	-NA-	PP3|PP5m	VUS	Downgrade
234925	236722	Microsatellite	NM_001128126	Pathogenic	criteria_provided,_multiple_submitters,_no_conflicts	splicing_variant	LOF	PVS1|PP5m	LP	intron_variant	PP3|PP5m	VUS	Downgrade
551370	547500	Duplication	NM_000070	Likely_pathogenic	criteria_provided,_multiple_submitters,_no_conflicts	splicing_variant	LOF	PVS1|PM2|PP5m	P	intron_variant	PP3|PM2|PP5m	VUS	Downgrade
855345	852135	Duplication	NM_003119	Pathogenic	criteria_provided,_multiple_submitters,_no_conflicts	splicing_variant	LOF	PVS1|PP5m|BS2	LP	intron_variant	PP3|PP5m|BS2	VUS	Downgrade
411680	402131	Deletion	NM_003119	Pathogenic	criteria_provided,_multiple_submitters,_no_conflicts	splicing_variant	LOF	PVS1|PP5m	LP	inframe_variant	inframe_variant|PM4	VUS	Downgrade
279920	264825	Microsatellite	NM_021074	Pathogenic	criteria_provided,_multiple_submitters,_no_conflicts	splicing_variant	LOF	PVS1|PP5m	LP	intron_variant	PP3|PP5m	VUS	Downgrade
189236	187130	Deletion	NM_003573	Pathogenic	criteria_provided,_multiple_submitters,_no_conflicts	frameshift_variant	LOF	PVS1|PP5m	LP	-NA-	PP3|PP5m	VUS	Downgrade
587762	580794	single nucleotide variant	NM_001372044	Pathogenic	criteria_provided,_multiple_submitters,_no_conflicts	nonsense	LOF	PVS1|PM2|PP5m	P	-NA-	PM2|PP3|PP5m	VUS	Downgrade
546923	537412	single nucleotide variant	NM_001372044	Pathogenic	criteria_provided,_multiple_submitters,_no_conflicts	splicing_variant	LOF	PVS1|PM2|PP5m	P	-NA-	PP3|PM2|PP5m	VUS	Downgrade
373766	360508	single nucleotide variant	NM_033517	Pathogenic	criteria_provided,_multiple_submitters,_no_conflicts	nonsense	LOF	PVS1|PM2|PP5m	P	-NA-	PP3|PM2|PP5m	VUS	Downgrade
208759	205325	Duplication	NM_033517	Pathogenic	criteria_provided,_multiple_submitters,_no_conflicts	frameshift_variant	LOF	PVS1|PM2|PP5m	P	-NA-	PP3|PM2|PP5m	VUS	Downgrade
422407	411055	single nucleotide variant	NM_001372044	Pathogenic	criteria_provided,_multiple_submitters,_no_conflicts	nonsense	LOF	PVS1|PM2|PP5m	P	-NA-	PP3|PM2|PP5m	VUS	Downgrade
988471	976476	single nucleotide variant	NM_001372044	Pathogenic	criteria_provided,_multiple_submitters,_no_conflicts	nonsense	LOF	PVS1|PM2|PP5m	P	-NA-	PP3|PM2|PP5m	VUS	Downgrade
992589	980514	single nucleotide variant	NM_001372044	Pathogenic	criteria_provided,_multiple_submitters,_no_conflicts	nonsense	LOF	PVS1|PM2|PP5m	P	-NA-	PP3|PM2|PP5m	VUS	Downgrade
767317	777088	Duplication	NM_172362	Benign	criteria_provided,_multiple_submitters,_no_conflicts	splicing_variant	LOF	PVS1|BS2|BP6-strong	B	intron_variant	BS2|BP6-strong	B	No change
182672	180101	Microsatellite	NM_000179	Benign	criteria_provided,_multiple_submitters,_no_conflicts	splicing_variant	LOF	PVS1|BS2|BP6-strong	B	intron_variant	BS2|BP6-strong	B	No change
89500	94974	Microsatellite	NM_000179	Likely_benign	reviewed_by_expert_panel	splicing_variant	LOF	PVS1|BP6-vs	B	intron_variant	BP6-vs	B	No change
515844	500068	Duplication	NM_001330078	Likely_benign	criteria_provided,_multiple_submitters,_no_conflicts	splicing_variant	LOF	PVS1|BS2|BP6-strong	B	intron_variant	BS2|BP6-strong	B	No change
1235647	1226027	Microsatellite	NM_024753	Benign	criteria_provided,_multiple_submitters,_no_conflicts	splicing_variant	LOF	PVS1|BA1|BP6-strong	B	intron_variant	BA1|BP6-strong	B	No change
136978	140681	single nucleotide variant	NM_015697	Benign	criteria_provided,_multiple_submitters,_no_conflicts	nonsense	LOF	PVS1|BS1|BS2|BP6-strong	B	-NA-	BS1|BS2|BP6-strong	B	No change
788291	779062	Duplication	NM_005573	Benign	criteria_provided,_multiple_submitters,_no_conflicts	splicing_variant	LOF	PVS1|BS2|BP6-strong	B	intron_variant	BS2|BP6-strong	B	No change
770913	777472	Duplication	NM_004134	Benign	criteria_provided,_multiple_submitters,_no_conflicts	splicing_variant	LOF	PVS1|BS2|BP6-strong	B	intron_variant	BS2|BP6-strong	B	No change
782466	779101	Duplication	NM_016222	Benign	criteria_provided,_multiple_submitters,_no_conflicts	splicing_variant	LOF	PVS1|BS2|BP6-strong	B	intron_variant	BS2|BP6-strong	B	No change
493449	486412	Duplication	NM_003730	Benign	criteria_provided,_multiple_submitters,_no_conflicts	splicing_variant	LOF	PVS1|BS2|BP6-strong	B	intron_variant	BS2|BP6-strong	B	No change
591286	582279	Microsatellite	NR_178195	Benign	criteria_provided,_multiple_submitters,_no_conflicts	nonsense	LOF	PVS1|BA1|BP6-strong	B	-NA-	BA1|BP6-strong	B	No change
415748	396740	Insertion	NM_019892	Likely_benign	criteria_provided,_multiple_submitters,_no_conflicts	splicing_variant	LOF	PVS1|BS2|BP6-strong	B	intron_variant	BS2|BP6-strong	B	No change
215526	212658	Insertion	NM_019892	Benign	criteria_provided,_multiple_submitters,_no_conflicts	splicing_variant	LOF	PVS1|BA1|BP6-strong	B	intron_variant	BA1|BP6-strong	B	No change
695325	685252	Insertion	NM_019892	Benign	criteria_provided,_multiple_submitters,_no_conflicts	splicing_variant	LOF	PVS1|BS2|BP6-strong	B	intron_variant	BS2|BP6-strong	B	No change
232320	233849	Microsatellite	NM_000314	Likely_benign	reviewed_by_expert_panel	splicing_variant	LOF	PVS1|BP6-vs	B	intron_variant	BP6-vs|PP3	B	No change
372049	358869	Duplication	NM_006231	Likely_benign	criteria_provided,_multiple_submitters,_no_conflicts	splicing_variant	LOF	PVS1|BS2|BP6-strong	B	intron_variant	BS2|BP6-strong	B	No change
240462	241405	Duplication	NM_006231	Benign	criteria_provided,_multiple_submitters,_no_conflicts	splicing_variant	LOF	PVS1|BS2|BP6-strong	B	intron_variant	BS2|BP6-strong	B	No change
206428	203581	Duplication	NM_007254	Likely_benign	criteria_provided,_multiple_submitters,_no_conflicts	splicing_variant	LOF	PVS1|BS2|BP6-strong	B	intron_variant	BS2|BP6-strong	B	No change
46126	55291	Duplication	NM_024022	Benign	criteria_provided,_multiple_submitters,_no_conflicts	splicing_variant	LOF	PVS1|BA1|BP6-strong	B	-NA-	BA1|BP6-strong	B	No change
156059	165855	Microsatellite	NM_001110792	Likely_benign	reviewed_by_expert_panel	splicing_variant	LOF	PVS1|BP6-vs	B	intron_variant	BP6-vs	B	No change
550168	541329	Duplication	NM_013339	Pathogenic	criteria_provided,_multiple_submitters,_no_conflicts	splicing_variant	LOF	PVS1|PM2|PP5m	P	intron_variant	PM2|PP5m|PP3	VUS	Downgrade
99352	105241	Deletion	NM_000350	Pathogenic	criteria_provided,_multiple_submitters,_no_conflicts	splicing_variant	LOF	PVS1|PP5m	LP	intron_variant	PP5m|PP3	VUS	Downgrade
859211	850731	Duplication	NM_002529	Pathogenic	criteria_provided,_multiple_submitters,_no_conflicts	splicing_variant	LOF	PVS1|PM2|PP5m	P	intron_variant	PM2|PP5m|PP3	VUS	Downgrade
536445	518311	Deletion	NM_014946	Pathogenic	criteria_provided,_multiple_submitters,_no_conflicts	splicing_variant	LOF	PVS1|PP5m	LP	intron_variant	PP5m|PP3	VUS	Downgrade
89412	94886	Deletion	NM_000179	Likely_pathogenic	criteria_provided,_multiple_submitters,_no_conflicts	splicing_variant	LOF	PVS1|PP5m	LP	intron_variant	PP5m	VUS	Downgrade
654352	650894	Microsatellite	NM_001165963	Pathogenic	criteria_provided,_multiple_submitters,_no_conflicts	splicing_variant	LOF	PVS1|PP5m	LP	intron_variant	PP5m|PP3	VUS	Downgrade
179692	172662	Duplication	NM_001256850	Pathogenic	criteria_provided,_multiple_submitters,_no_conflicts	frameshift_variant	LOF	PVS1|PM2|PP5m	P	-NA-	PM2|PP5m	VUS	Downgrade
290469	274706	Deletion	NM_003319	Pathogenic	criteria_provided,_multiple_submitters,_no_conflicts	frameshift_variant	LOF	PVS1|PP5m	LP	-NA-	PP5m	VUS	Downgrade
165810	172696	Deletion	NM_003319	Likely_pathogenic	criteria_provided,_multiple_submitters,_no_conflicts	nonsense	LOF	PVS1|PP5m	LP	-NA-	PP5m	VUS	Downgrade
228304	228653	Duplication	NM_003319	Likely_pathogenic	criteria_provided,_multiple_submitters,_no_conflicts	frameshift_variant	LOF	PVS1|PM2|PP5m	P	-NA-	PM2|PP5m	VUS	Downgrade
179375	172726	Deletion	NM_133378	Likely_pathogenic	criteria_provided,_multiple_submitters,_no_conflicts	frameshift_variant	LOF	PVS1|PP5m	LP	-NA-	PP5m	VUS	Downgrade
438052	431648	Microsatellite	NM_201548	Pathogenic	criteria_provided,_multiple_submitters,_no_conflicts	splicing_variant	LOF	PVS1|PP5m	LP	intron_variant	PP5m|PP3	VUS	Downgrade
1778980	1831564	Duplication	NM_000249	Likely_pathogenic	criteria_provided,_multiple_submitters,_no_conflicts	splicing_variant	LOF	PVS1|PM2|PP5m	P	intron_variant	PM2|PP5m|PP3	VUS	Downgrade
547999	538368	Microsatellite	NM_133330	Pathogenic	criteria_provided,_multiple_submitters,_no_conflicts	splicing_variant	LOF	PVS1|PP5m	LP	-NA-	PP5m|PP3	VUS	Downgrade
411336	394197	Duplication	NM_000038	Pathogenic	criteria_provided,_multiple_submitters,_no_conflicts	splicing_variant	LOF	PVS1|PM2|PP5m	P	intron_variant	PM2|PP5m|PP3	VUS	Downgrade
181775	180179	Deletion	NM_000038	Pathogenic	criteria_provided,_multiple_submitters,_no_conflicts	splicing_variant	LOF	PVS1|PP5m	LP	intron_variant	PP5m|PP3	VUS	Downgrade
633040	621734	Duplication	NM_000038	Pathogenic	criteria_provided,_multiple_submitters,_no_conflicts	splicing_variant	LOF	PVS1|PM2|PP5m	P	intron_variant	PM2|PP5m	VUS	Downgrade
565696	560386	Deletion	NM_022455	Pathogenic	criteria_provided,_multiple_submitters,_no_conflicts	splicing_variant	LOF	PVS1|PP5m	LP	intron_variant	PP5m|PP3	VUS	Downgrade
1062642	1044355	Deletion	NM_004370	Pathogenic	criteria_provided,_multiple_submitters,_no_conflicts	splicing_variant	LOF	PVS1|PP5m	LP	intron_variant	PP5m|PP3	VUS	Downgrade
430079	421603	Microsatellite	NM_017934	Likely_pathogenic	criteria_provided,_multiple_submitters,_no_conflicts	splicing_variant	LOF	PVS1|PP5m	LP	intron_variant	PP5m|PP3	VUS	Downgrade
590717	581356	Microsatellite	NM_194454	Pathogenic	criteria_provided,_multiple_submitters,_no_conflicts	splicing_variant	LOF	PVS1|PP5m	LP	intron_variant	PP5m|PP3	VUS	Downgrade
503685	495362	Deletion	NM_000089	Pathogenic	criteria_provided,_multiple_submitters,_no_conflicts	splicing_variant	LOF	PVS1|PP5m	LP	intron_variant	PP5m|PP3	VUS	Downgrade
487380	480449	Duplication	NM_000492	Pathogenic	reviewed_by_expert_panel	splicing_variant	LOF	PVS1|PM2|PP5vs	P	intron_variant	PM2|PP5vs|PP3	P	No change
2503	17542	Microsatellite	NM_000127	Pathogenic	criteria_provided,_multiple_submitters,_no_conflicts	splicing_variant	LOF	PVS1|PP5m	LP	intron_variant	PP5m|PP3	VUS	Downgrade
370508	357777	Deletion	NM_000050	Pathogenic	criteria_provided,_multiple_submitters,_no_conflicts	splicing_variant	LOF	PVS1|PP5m	LP	-NA-	PP5m|PP3	VUS	Downgrade
1301338	1291621	Deletion	NM_001164277	Pathogenic	criteria_provided,_multiple_submitters,_no_conflicts	splicing_variant	LOF	PVS1|PP5m	LP	-NA-	PP5m|PP3	VUS	Downgrade
987812	975803	Deletion	NM_001164277	Pathogenic	criteria_provided,_multiple_submitters,_no_conflicts	frameshift_variant	LOF	PVS1|PP5m	LP	-NA-	PP5m	VUS	Downgrade
1444451	1388416	Deletion	NM_001164277	Pathogenic	criteria_provided,_multiple_submitters,_no_conflicts	frameshift_variant	LOF	PVS1|PP5m	LP	-NA-	PP5m	VUS	Downgrade
1451212	1429466	Duplication	NM_001164277	Pathogenic	criteria_provided,_multiple_submitters,_no_conflicts	frameshift_variant	LOF	PVS1|PM2|PP5m	P	-NA-	PM2|PP5m	VUS	Downgrade
651791	639761	Duplication	NM_001164277	Pathogenic	criteria_provided,_multiple_submitters,_no_conflicts	frameshift_variant	LOF	PVS1|PM2|PP5m	P	-NA-	PM2|PP5m	VUS	Downgrade
2125836	2174667	Deletion	NM_001164277	Pathogenic	criteria_provided,_multiple_submitters,_no_conflicts	frameshift_variant	LOF	PVS1|PP5m	LP	-NA-	PP5m	VUS	Downgrade
1076502	1062249	Deletion	NM_001164277	Pathogenic	criteria_provided,_multiple_submitters,_no_conflicts	frameshift_variant	LOF	PVS1|PP5m	LP	-NA-	PP5m	VUS	Downgrade
558317	545972	Deletion	NM_001164277	Likely_pathogenic	criteria_provided,_multiple_submitters,_no_conflicts	frameshift_variant	LOF	PVS1|PP5m	LP	-NA-	PP5m	VUS	Downgrade
552905	545642	Deletion	NM_001164277	Pathogenic	criteria_provided,_multiple_submitters,_no_conflicts	frameshift_variant	LOF	PVS1|PP5m	LP	-NA-	PP5m	VUS	Downgrade
550962	546353	Duplication	NM_001164277	Pathogenic	criteria_provided,_multiple_submitters,_no_conflicts	frameshift_variant	LOF	PVS1|PM2|PP5m	P	-NA-	PM2|PP5m	VUS	Downgrade
1185582	1175554	Microsatellite	NM_005422	Pathogenic	criteria_provided,_multiple_submitters,_no_conflicts	splicing_variant	LOF	PVS1|PP5m	LP	intron_variant	PP5m|PP3	VUS	Downgrade
517335	497223	Duplication	NM_004572	Pathogenic	criteria_provided,_multiple_submitters,_no_conflicts	frameshift_variant	LOF	PVS1|PM2|PP5m	P	-NA-	PM2|PP5m	VUS	Downgrade
102613	108349	Deletion	NM_000277	Likely_pathogenic	reviewed_by_expert_panel	splicing_variant	LOF	PVS1|PM1|PP5vs	P	inframe_variant	inframe_variant|PM4	P	No change
141090	150804	Duplication	NM_000059	Pathogenic	criteria_provided,_multiple_submitters,_no_conflicts	splicing_variant	LOF	PVS1|PM2|PP5m	P	intron_variant	PM2|PP5m|PP3	VUS	Downgrade
428720	420522	Duplication	NM_000321	Pathogenic	criteria_provided,_multiple_submitters,_no_conflicts	splicing_variant	LOF	PVS1|PM2|PP5m	P	intron_variant	PM2|PP5m|PP3	VUS	Downgrade
428676	420586	Deletion	NM_000321	Pathogenic	criteria_provided,_multiple_submitters,_no_conflicts	splicing_variant	LOF	PVS1|PP5m	LP	intron_variant	PP5m|PP3	VUS	Downgrade
41281	49705	Microsatellite	NM_025137	Pathogenic	criteria_provided,_multiple_submitters,_no_conflicts	splicing_variant	LOF	PVS1|PP5m	LP	intron_variant	PP5m|PP3	VUS	Downgrade
636961	624801	Deletion	NM_000138	Likely_pathogenic	reviewed_by_expert_panel	splicing_variant	LOF	PVS1|PP5vs	P	intron_variant	PP5vs|PP3	VUS	Downgrade
1012856	1000908	Insertion	NM_033028	Pathogenic	criteria_provided,_multiple_submitters,_no_conflicts	splicing_variant	LOF	PVS1|PM2|PP5m	P	intron_variant	PM2|PP5m	VUS	Downgrade
406624	401300	Duplication	NM_004360	Pathogenic	reviewed_by_expert_panel	splicing_variant	LOF	PVS1|PM2|PP5vs	P	intron_variant	PM2|PP5vs|PP3	P	No change
463722	466577	Insertion	NM_004360	Pathogenic	criteria_provided,_multiple_submitters,_no_conflicts	splicing_variant	LOF	PVS1|PM2|PP5m	P	intron_variant	PM2|PP5m	VUS	Downgrade
265490	260133	Deletion	NM_001127464	Pathogenic	criteria_provided,_multiple_submitters,_no_conflicts	frameshift_variant	LOF	PVS1|PP5m	LP	-NA-	PP5m	VUS	Downgrade
982794	971092	single nucleotide variant	NM_000937	Pathogenic	criteria_provided,_multiple_submitters,_no_conflicts	nonsense	LOF	PVS1|PM2|PP5m	P	-NA-	PM2|PP5m	VUS	Downgrade
404525	401595	Microsatellite	NM_000267	Pathogenic	criteria_provided,_multiple_submitters,_no_conflicts	splicing_variant	LOF	PVS1|PP5m	LP	-NA-	PP5m|PP3	VUS	Downgrade
653570	652717	Microsatellite	NM_000267	Pathogenic	criteria_provided,_multiple_submitters,_no_conflicts	splicing_variant	LOF	PVS1|PP5m	LP	-NA-	PP5m|PP3	VUS	Downgrade
457536	466451	Deletion	NM_001042492	Pathogenic	criteria_provided,_multiple_submitters,_no_conflicts	splicing_variant	LOF	PVS1|PP5m	LP	intron_variant	PP5m	VUS	Downgrade
647570	653233	Deletion	NM_000267	Pathogenic	criteria_provided,_multiple_submitters,_no_conflicts	splicing_variant	LOF	PVS1|PP5m	LP	-NA-	PP5m	VUS	Downgrade
1929509	1984517	Microsatellite	NM_001042492	Pathogenic	criteria_provided,_multiple_submitters,_no_conflicts	splicing_variant	LOF	PVS1|PP5m	LP	intron_variant	PP5m|PP3	VUS	Downgrade
503953	495413	Deletion	NM_000267	Pathogenic	criteria_provided,_multiple_submitters,_no_conflicts	splicing_variant	LOF	PVS1|PP5m	LP	-NA-	PP5m|PP3	VUS	Downgrade
1810581	1867596	Deletion	NM_000267	Pathogenic	criteria_provided,_multiple_submitters,_no_conflicts	splicing_variant	LOF	PVS1|PP5m	LP	-NA-	PP5m|PP3	VUS	Downgrade
635668	623562	Deletion	NM_000458	Pathogenic	criteria_provided,_multiple_submitters,_no_conflicts	splicing_variant	LOF	PVS1|PP5m	LP	intron_variant	PP5m|PP3	VUS	Downgrade
586221	577636	Microsatellite	NM_002087	Pathogenic	criteria_provided,_multiple_submitters,_no_conflicts	splicing_variant	LOF	PVS1|PP5m	LP	intron_variant	PP5m	VUS	Downgrade
1879044	1935793	Deletion	NM_000419	Likely_pathogenic	reviewed_by_expert_panel	splicing_variant	LOF	PVS1|PP5vs	P	intron_variant	PP5vs|PP3	VUS	Downgrade
88866	94435	Deletion	NM_001031726	Pathogenic	criteria_provided,_multiple_submitters,_no_conflicts	splicing_variant	LOF	PVS1|PM4|PP5m	LP	-NA-	PM4|PP5m	VUS	Downgrade
871361	860610	Microsatellite	NM_015629	Pathogenic	criteria_provided,_multiple_submitters,_no_conflicts	splicing_variant	LOF	PVS1|PP5m	LP	intron_variant	PP5m	VUS	Downgrade
417999	410756	Microsatellite	NM_000022	Likely_pathogenic	criteria_provided,_multiple_submitters,_no_conflicts	splicing_variant	LOF	PVS1|PP5m	LP	intron_variant	PP5m|PP3	VUS	Downgrade
435011	430428	Deletion	NM_001347721	Pathogenic	criteria_provided,_multiple_submitters,_no_conflicts	splicing_variant	LOF	PVS1|PP5m	LP	intron_variant	PP5m|PP3	VUS	Downgrade
216652	213482	Deletion	NM_007194	Pathogenic	criteria_provided,_multiple_submitters,_no_conflicts	splicing_variant	LOF	PVS1|PP5m	LP	intron_variant	PP5m|PP3	VUS	Downgrade
978894	967012	Deletion	NM_001372044	Pathogenic	criteria_provided,_multiple_submitters,_no_conflicts	frameshift_variant	LOF	PVS1|PP5m	LP	-NA-	PP5m	VUS	Downgrade
1334393	1325265	Duplication	NM_001372044	Pathogenic	criteria_provided,_multiple_submitters,_no_conflicts	frameshift_variant	LOF	PVS1|PM2|PP5m	P	-NA-	PM2|PP5m	VUS	Downgrade
436718	430597	Deletion	NM_033517	Pathogenic	criteria_provided,_multiple_submitters,_no_conflicts	frameshift_variant	LOF	PVS1|PP5m	LP	-NA-	PP5m	VUS	Downgrade
1683569	1675500	Deletion	NM_001372044	Pathogenic	criteria_provided,_multiple_submitters,_no_conflicts	frameshift_variant	LOF	PVS1|PP5m	LP	-NA-	PP5m	VUS	Downgrade
522005	512548	Deletion	NM_001372044	Pathogenic	criteria_provided,_multiple_submitters,_no_conflicts	frameshift_variant	LOF	PVS1|PP5m	LP	-NA-	PP5m	VUS	Downgrade
279892	264790	Deletion	NM_001372044	Pathogenic	criteria_provided,_multiple_submitters,_no_conflicts	frameshift_variant	LOF	PVS1|PP5m	LP	-NA-	PP5m	VUS	Downgrade
978857	967017	Deletion	NM_001372044	Pathogenic	criteria_provided,_multiple_submitters,_no_conflicts	frameshift_variant	LOF	PVS1|PP5m	LP	-NA-	PP5m	VUS	Downgrade
633510	621990	Microsatellite	NM_001372044	Pathogenic	criteria_provided,_multiple_submitters,_no_conflicts	frameshift_variant	LOF	PVS1|PM2|PP5m	P	-NA-	PM2|PP5m	VUS	Downgrade
372353	360631	Microsatellite	NM_000397	Pathogenic	criteria_provided,_multiple_submitters,_no_conflicts	splicing_variant	LOF	PVS1|PP5m	LP	intron_variant	PP5m|PP3	VUS	Downgrade
210437	209262	Deletion	NM_000052	Pathogenic	criteria_provided,_multiple_submitters,_no_conflicts	splicing_variant	LOF	PVS1|PP5m	LP	intron_variant	PP5m|PP3	VUS	Downgrade
562420	553604	Duplication	NM_033380	Pathogenic	criteria_provided,_multiple_submitters,_no_conflicts	splicing_variant	LOF	PVS1|PM1|PM2|PP5m	P	intron_variant	PM1|PM2|PP5m	LP	No change
44442	53609	Deletion	NM_002294	Pathogenic	criteria_provided,_multiple_submitters,_no_conflicts	splicing_variant	LOF	PVS1|PP5m	LP	intron_variant	PP5m|PP3	VUS	Downgrade
1192179	1182058	Deletion	NM_001379110	Pathogenic	criteria_provided,_multiple_submitters,_no_conflicts	splicing_variant	LOF	PVS1|PP5m	LP	intron_variant	PP5m|PP3	VUS	Downgrade
987256	975592	Microsatellite	NM_002024	Pathogenic	criteria_provided,_multiple_submitters,_no_conflicts	splicing_variant	LOF	PVS1|PP5m	LP	intron_variant	PP5m|PP3	VUS	Downgrade

## Sheet: SnpEff_PVS1-loss_summary
PVS1-loss
ClinVar LoF	31640
SnpEff inconsistant with ClinVar	782
ClinVar LoF and SnpEff not LoF (PVS1-loss)	161
ClinVar LoF and SnpEff not LoF and no conflict	138
	ClinVar_Curated_Classes
SnpEff_Curated_Classes	P	LP	LB	B	All
no change	4	0	0	21	25
downgrade	43	70	0	0	113
SUM	47	70	0	21	138

## Sheet: SnpEff_PVS1-gain no conflict
VariationID	AlleleID	Type	NM	ClinVar_CLNSIG	ClinVar_CLNREVSTAT	ClinVar_Coding_impact	ClinVar_Category	ACMG_rule_ClinVar_coding_impact	ClinVar_Curated_Classes	SnpEff_coding impact	ACMG_rule_ SnpEff_coding_impact	SnpEff_Curated_Classes	Grade_Change
510925	499975	Duplication	NM_005911	Benign	criteria_provided,_multiple_submitters,_no_conflicts	intron_variant	Others	PP3|BS2|BP6-strong	B	splicing_variant	PVS1|BS2|BP6-strong	B	No change
1166023	1153775	Duplication	NM_006267	Benign	criteria_provided,_multiple_submitters,_no_conflicts	intron_variant	Others	BS2|BP6-strong	B	splicing_variant	PVS1|BS2|BP6-strong	B	No change
1645773	1565377	Duplication	NM_001873	Benign	criteria_provided,_multiple_submitters,_no_conflicts	intron_variant	Others	BS1|BS2|BP6-strong	B	splicing_variant	PVS1|BS1|BS2|BP6-strong	B	No change
1195349	1183694	Duplication	NM_002890	Benign	criteria_provided,_multiple_submitters,_no_conflicts	intron_variant	Others	BS2|BP6-strong	B	splicing_variant	PVS1|BS2|BP6-strong	B	No change
700082	689820	Duplication	NM_006772	Likely_benign	criteria_provided,_multiple_submitters,_no_conflicts	intron_variant	Others	PP3|BS2|BP6-strong	B	splicing_variant	PVS1|BS2|BP6-strong	B	No change
694980	683117	Duplication	NM_014845	Benign	criteria_provided,_multiple_submitters,_no_conflicts	intron_variant	Others	BA1|BP6-strong	B	splicing_variant	PVS1|BA1|BP6-strong	B	No change
917084	905585	Duplication	NM_014845	Benign	criteria_provided,_multiple_submitters,_no_conflicts	intron_variant	Others	BS2|BP6-strong	B	splicing_variant	PVS1|BS2|BP6-strong	B	No change
588402	579181	Duplication	NM_001374828	Benign	criteria_provided,_multiple_submitters,_no_conflicts	intron_variant	Others	PP3|BS2|BP6-strong	B	splicing_variant	PVS1|BS2|BP6-strong	B	No change
420477	406987	Duplication	NM_018238	Benign	criteria_provided,_multiple_submitters,_no_conflicts	intron_variant	Others	BS2|BP6-strong	B	splicing_variant	PVS1|BS2|BP6-strong	B	No change
166861	177589	Duplication	NM_017780	Benign	criteria_provided,_multiple_submitters,_no_conflicts	intron_variant	Others	BS2|BP6-strong	B	splicing_variant	PVS1|BS2|BP6-strong	B	No change
264321	258534	Duplication	NM_000093	Benign	criteria_provided,_multiple_submitters,_no_conflicts	intron_variant	Others	BS2|BP6-strong	B	splicing_variant	PVS1|BS2|BP6-strong	B	No change
196185	193346	Microsatellite	NM_020822	Benign	criteria_provided,_multiple_submitters,_no_conflicts	intron_variant	Others	BS2|BP6-strong	B	splicing_variant	PVS1|BS2|BP6-strong	B	No change
421819	407617	Microsatellite	NM_020822	Likely_benign	criteria_provided,_multiple_submitters,_no_conflicts	intron_variant	Others	BS2|BP6-strong	B	splicing_variant	PVS1|BS2|BP6-strong	B	No change
218872	215412	Insertion	NM_201596	Likely_benign	criteria_provided,_multiple_submitters,_no_conflicts	intron_variant	Others	BS2|BP6-strong	B	splicing_variant	PVS1|BS2|BP6-strong	B	No change
92831	98738	Duplication	NM_000314	Benign	criteria_provided,_multiple_submitters,_no_conflicts	intron_variant	Others	BA1|BP6-strong	B	splicing_variant	PVS1|BA1|BP6-strong	B	No change
92832	98739	Duplication	NM_000314	Benign	criteria_provided,_multiple_submitters,_no_conflicts	intron_variant	Others	BS2|BP6-strong	B	splicing_variant	PVS1|BS2|BP6-strong	B	No change
802611	791005	Duplication	NM_000314	Benign	criteria_provided,_multiple_submitters,_no_conflicts	intron_variant	Others	BS2|BP6-strong	B	splicing_variant	PVS1|BS2|BP6-strong	B	No change
923645	915754	Duplication	NM_000218	Benign	criteria_provided,_multiple_submitters,_no_conflicts	intron_variant	Others	BS2|BP6-strong	B	splicing_variant	PVS1|BS2|BP6-strong	B	No change
181847	180398	Duplication	NM_000051	Benign	criteria_provided,_multiple_submitters,_no_conflicts	intron_variant	Others	BA1|BP6-strong	B	splicing_variant	PVS1|BA1|BP6-strong	B	No change
252784	247085	Duplication	NM_144670	Benign	criteria_provided,_multiple_submitters,_no_conflicts	intron_variant	Others	BS2|BP6-strong	B	splicing_variant	PVS1|BS2|BP6-strong	B	No change
1241049	1230587	Duplication	NM_018082	Benign	criteria_provided,_multiple_submitters,_no_conflicts	intron_variant	Others	BA1|BP6-strong	B	splicing_variant	PVS1|BA1|BP6-strong	B	No change
1275967	1268596	Duplication	NM_018082	Benign	criteria_provided,_multiple_submitters,_no_conflicts	intron_variant	Others	BS1|BS2|BP6-strong	B	splicing_variant	PVS1|BS1|BS2|BP6-strong	B	No change
1169908	1156937	Duplication	NM_012463	Benign	criteria_provided,_multiple_submitters,_no_conflicts	intron_variant	Others	BS2|BP6-strong	B	splicing_variant	PVS1|BS2|BP6-strong	B	No change
198581	195742	Duplication	NM_020751	Benign	criteria_provided,_multiple_submitters,_no_conflicts	intron_variant	Others	BA1|BP6-strong	B	splicing_variant	PVS1|BA1|BP6-strong	B	No change
422120	409128	Duplication	NM_015915	Benign	criteria_provided,_multiple_submitters,_no_conflicts	intron_variant	Others	BS2|BP6-strong	B	splicing_variant	PVS1|BS2|BP6-strong	B	No change
1174690	1164462	Duplication	NM_182914	Benign	criteria_provided,_multiple_submitters,_no_conflicts	intron_variant	Others	BA1|BP6-strong	B	splicing_variant	PVS1|BA1|BP6-strong	B	No change
281246	265483	Duplication	NM_182914	Benign	criteria_provided,_multiple_submitters,_no_conflicts	intron_variant	Others	BS2|BP6-strong	B	splicing_variant	PVS1|BS2|BP6-strong	B	No change
220995	222591	Duplication	NM_001042492	Benign	criteria_provided,_multiple_submitters,_no_conflicts	intron_variant	Others	BS2|BP6-strong	B	splicing_variant	PVS1|BS2|BP6-strong	B	No change
623943	613130	Duplication	NM_014727	Benign	criteria_provided,_multiple_submitters,_no_conflicts	intron_variant	Others	BS2|BP6-strong	B	splicing_variant	PVS1|BS2|BP6-strong	B	No change
93925	99827	Duplication	NM_001849	Benign	criteria_provided,_multiple_submitters,_no_conflicts	intron_variant	Others	BA1|BP6-strong	B	splicing_variant	PVS1|BA1|BP6-strong	B	No change
290341	274578	Duplication	NM_001849	Benign	criteria_provided,_multiple_submitters,_no_conflicts	intron_variant	Others	BS2|BP6-strong	B	splicing_variant	PVS1|BS2|BP6-strong	B	No change
90779	96254	Deletion	NM_000251	Pathogenic	reviewed_by_expert_panel	genic_downstream_transcript_variant	Others	PM1|PP5vs|PP3	P	frameshift_variant	PVS1|PM1|PP5vs	P	No change

## Sheet: SnpEff_PVS1-gain_summary
PVS1-gain
ClinVar not LoF	132909
SnpEff inconsistant with ClinVar	581
ClinVar not LoF and SnpEff LoF (PVS1-gain)	50
ClinVar not LoF and SnpEff LoF and no conflict	32
	ClinVar_Curated_Classes
SnpEff_Curated_Classes	P	LP	LB	B	All
no change	1	0	0	31	32
upgrade	0	0	0	0	0
SUM	1	0	0	31	32

## Sheet: SnpEff_PVS1-change summary
ClinVar LoF and SnpEff not LoF and no conflict (PVS1-loss)	138
ClinVar not LoF and SnpEff LoF and no conflict (PVS1-gain)	32
		ClinVar_Curated_Classes
	SnpEff_Curated_Classes	P	LP	LB	B	All
	no change	5	0	0	52	57
	downgrade	43	70	0	0	113
	upgrade	0	0	0	0	0
	SUM	48	70	0	52	170
Note
* no conflict: ClinVar_CLNSIG VS. ClinVar_Curated_Classes
1. BLB>BLB=no conflict
2. PLP>PLP=no conflict
*downgrade or upgrade: SnpEff_Curated_Classes VS. ClinVar_Curated_Classes
1. BLB>BLB=no change
2. PLP>PLP=no change
