# Supplementary material for: Toward streamline variant classification: discrepancies in variant nomenclature and syntax for ClinVar pathogenic variants across annotation tools
Source: Hum Genomics. 2025 Jun 21;19:70. doi: 10.1186/s40246-025-00778-x (PMC12181866; doi:10.1186/s40246-025-00778-x)
Supplement: Supplementary file 21 — Additional file 21 [file 40246_2025_778_MOESM21_ESM.xlsx]

## Sheet: VEP_PVS1-loss no conflict
VariationID	AlleleID	Type	NM	ClinVar_CLNSIG	ClinVar_CLNREVSTAT	ClinVar_Coding_impact	ClinVar_Category	ACMG_rule_ClinVar_coding_impact	ClinVar_Curated_Classes	VEP_coding impact	ACMG_rule_ VEP_coding_impact	VEP_Curated_Classes	Grade_Change
767317	777088	Duplication	NM_172362	Benign	criteria_provided,_multiple_submitters,_no_conflicts	splicing_variant	LOF	PVS1|BS2|BP6-strong	B	intron_variant	PP3|BS2|BP6-strong	B	No change
515844	500068	Duplication	NM_001330078	Likely_benign	criteria_provided,_multiple_submitters,_no_conflicts	splicing_variant	LOF	PVS1|BS2|BP6-strong	B	intron_variant	PP3|BS2|BP6-strong	B	No change
1235647	1226027	Microsatellite	NM_024753	Benign	criteria_provided,_multiple_submitters,_no_conflicts	splicing_variant	LOF	PVS1|BA1|BP6-strong	B	intron_variant	BA1|BP6-strong	B	No change
770913	777472	Duplication	NM_004134	Benign	criteria_provided,_multiple_submitters,_no_conflicts	splicing_variant	LOF	PVS1|BS2|BP6-strong	B	intron_variant	BS2|BP6-strong	B	No change
782466	779101	Duplication	NM_016222	Benign	criteria_provided,_multiple_submitters,_no_conflicts	splicing_variant	LOF	PVS1|BS2|BP6-strong	B	intron_variant	BS2|BP6-strong	B	No change
493449	486412	Duplication	NM_003730	Benign	criteria_provided,_multiple_submitters,_no_conflicts	splicing_variant	LOF	PVS1|BS2|BP6-strong	B	intron_variant	BS2|BP6-strong	B	No change
415748	396740	Insertion	NM_019892	Likely_benign	criteria_provided,_multiple_submitters,_no_conflicts	splicing_variant	LOF	PVS1|BS2|BP6-strong	B	intron_variant	BS2|BP6-strong	B	No change
215526	212658	Insertion	NM_019892	Benign	criteria_provided,_multiple_submitters,_no_conflicts	splicing_variant	LOF	PVS1|BA1|BP6-strong	B	intron_variant	BA1|BP6-strong	B	No change
695325	685252	Insertion	NM_019892	Benign	criteria_provided,_multiple_submitters,_no_conflicts	splicing_variant	LOF	PVS1|BS2|BP6-strong	B	intron_variant	BS2|BP6-strong	B	No change
372049	358869	Duplication	NM_006231	Likely_benign	criteria_provided,_multiple_submitters,_no_conflicts	splicing_variant	LOF	PVS1|BS2|BP6-strong	B	intron_variant	BS2|BP6-strong	B	No change
240462	241405	Duplication	NM_006231	Benign	criteria_provided,_multiple_submitters,_no_conflicts	splicing_variant	LOF	PVS1|BS2|BP6-strong	B	intron_variant	BS2|BP6-strong	B	No change
726266	739835	single nucleotide variant	NM_020778	Benign	criteria_provided,_multiple_submitters,_no_conflicts	nonsense	LOF	PVS1|BS2|BP6-strong	B	genic_upstream_transcript_variant	PP3|BS2|BP6-strong	B	No change
540281	530443	Microsatellite	NM_004960	Benign	criteria_provided,_multiple_submitters,_no_conflicts	splicing_variant	LOF	PVS1|BP6-strong|BP3	LB	inframe_variant	PP3|BP6-strong	LB	No change
1637950	1559854	Microsatellite	NM_006949	Benign	criteria_provided,_multiple_submitters,_no_conflicts	splicing_variant	LOF	PVS1|BS2|BP6-strong	B	intron_variant	BS2|BP6-strong	B	No change
206428	203581	Duplication	NM_007254	Likely_benign	criteria_provided,_multiple_submitters,_no_conflicts	splicing_variant	LOF	PVS1|BS2|BP6-strong	B	intron_variant	BS2|BP6-strong	B	No change
99352	105241	Deletion	NM_000350	Pathogenic	criteria_provided,_multiple_submitters,_no_conflicts	splicing_variant	LOF	PVS1|PP5m	LP	intron_variant	PP3|PP5m	VUS	Downgrade
1032776	1019098	Duplication	NM_001854	Pathogenic	criteria_provided,_multiple_submitters,_no_conflicts	splicing_variant	LOF	PVS1|PM2|PP5m	P	intron_variant	PM2|PP3|PP5m	VUS	Downgrade
206892	201619	Duplication	NM_001165963	Pathogenic	criteria_provided,_multiple_submitters,_no_conflicts	splicing_variant	LOF	PVS1|PM2|PP5m	P	intron_variant	PM2|PP3|PP5m	VUS	Downgrade
654352	650894	Microsatellite	NM_001165963	Pathogenic	criteria_provided,_multiple_submitters,_no_conflicts	splicing_variant	LOF	PVS1|PP5m	P	intron_variant	PP3|PP5m	VUS	Downgrade
438052	431648	Microsatellite	NM_201548	Pathogenic	criteria_provided,_multiple_submitters,_no_conflicts	splicing_variant	LOF	PVS1|PP5m	P	intron_variant	PP3|PP5m	VUS	Downgrade
2452051	2426691	Insertion	NM_000249	Likely_pathogenic	criteria_provided,_multiple_submitters,_no_conflicts	splicing_variant	LOF	PVS1|PM2|PP5m	P	Others	PM2|PP5m	VUS	Downgrade
1062642	1044355	Deletion	NM_004370	Pathogenic	criteria_provided,_multiple_submitters,_no_conflicts	splicing_variant	LOF	PVS1|PP5m	P	intron_variant	PP3|PP5m	VUS	Downgrade
430079	421603	Microsatellite	NM_017934	Likely_pathogenic	criteria_provided,_multiple_submitters,_no_conflicts	splicing_variant	LOF	PVS1|PP5m	LP	intron_variant	PP3|PP5m	VUS	Downgrade
590717	581356	Microsatellite	NM_194454	Pathogenic	criteria_provided,_multiple_submitters,_no_conflicts	splicing_variant	LOF	PVS1|PP5m	LP	intron_variant	PP3|PP5m	VUS	Downgrade
43506	52676	Duplication	NM_000441	Pathogenic	criteria_provided,_multiple_submitters,_no_conflicts	splicing_variant	LOF	PVS1|PM2|PP5m	P	intron_variant	PM2|PP3|PP5m	VUS	Downgrade
802370	790698	Duplication	NM_020632	Pathogenic	criteria_provided,_multiple_submitters,_no_conflicts	splicing_variant	LOF	PVS1|PM2|PP5m	P	intron_variant	PM2|PP3|PP5m	VUS	Downgrade
1517029	1515189	Inversion	NM_002485	Likely_pathogenic	criteria_provided,_multiple_submitters,_no_conflicts	splicing_variant	LOF	PVS1|PP5m	LP	Others	PP5m	VUS	Downgrade
2503	17542	Microsatellite	NM_000127	Pathogenic	criteria_provided,_multiple_submitters,_no_conflicts	splicing_variant	LOF	PVS1|PP5m	LP	intron_variant	PP3|PP5m	VUS	Downgrade
1301338	1291621	Deletion	NM_001164277	Pathogenic	criteria_provided,_multiple_submitters,_no_conflicts	splicing_variant	LOF	PVS1|PP5m	LP	intron_variant	PP3|PP5m	VUS	Downgrade
1332834	1323552	Duplication	NM_001844	Pathogenic	criteria_provided,_multiple_submitters,_no_conflicts	splicing_variant	LOF	PVS1|PM2|PP5m	P	intron_variant	PM2|PP5m	VUS	Downgrade
102613	108349	Deletion	NM_000277	Likely_pathogenic	reviewed_by_expert_panel	splicing_variant	LOF	PVS1|PM1|PP5vs	P	inframe_variant	PM1|PP3|PP5vs	P	No change
812555	800795	Duplication	NM_000059	Pathogenic	reviewed_by_expert_panel	splicing_variant	LOF	PVS1|PM2|PP5vs	P	intron_variant	PM2|PP5vs	LP	No change
267721	262861	Duplication	NM_000059	Pathogenic	criteria_provided,_multiple_submitters,_no_conflicts	splicing_variant	LOF	PVS1|PM2|PP5m	P	intron_variant	PM2|PP5m	VUS	Downgrade
996113	983819	Duplication	NM_000161	Pathogenic	criteria_provided,_multiple_submitters,_no_conflicts	splicing_variant	LOF	PVS1|PM2|PP5m	P	intron_variant	PM2|PP3|PP5m	VUS	Downgrade
41281	49705	Microsatellite	NM_025137	Pathogenic	criteria_provided,_multiple_submitters,_no_conflicts	splicing_variant	LOF	PVS1|PP5m	P	intron_variant	PP3|PP5m	VUS	Downgrade
636961	624801	Deletion	NM_000138	Likely_pathogenic	reviewed_by_expert_panel	splicing_variant	LOF	PVS1|PP5vs	P	intron_variant	PP3|PP5vs	VUS	Downgrade
265490	260133	Deletion	NM_001127464	Pathogenic	criteria_provided,_multiple_submitters,_no_conflicts	frameshift_variant	LOF	PVS1|PP5m	LP	-NA-	PP5m	VUS	Downgrade
239501	242530	Deletion	NM_003119	Pathogenic	criteria_provided,_multiple_submitters,_no_conflicts	splicing_variant	LOF	PVS1|PP5m	LP	inframe_variant	PP5m	VUS	Downgrade
635668	623562	Deletion	NM_000458	Pathogenic	criteria_provided,_multiple_submitters,_no_conflicts	splicing_variant	LOF	PVS1|PP5m	LP	intron_variant	PP3|PP5m	VUS	Downgrade
1879044	1935793	Deletion	NM_000419	Likely_pathogenic	reviewed_by_expert_panel	splicing_variant	LOF	PVS1|PP5vs	P	intron_variant	PP3|PP5vs	VUS	Downgrade
128174	133631	Duplication	NM_032043	Pathogenic	criteria_provided,_multiple_submitters,_no_conflicts	splicing_variant	LOF	PVS1|PP5m|BS2	LP	intron_variant	PP3|PP5m|BS2	VUS	Downgrade
12675	27714	Microsatellite	NM_002734	Pathogenic	criteria_provided,_multiple_submitters,_no_conflicts	splicing_variant	LOF	PVS1|PP5m	LP	intron_variant	PP5m	VUS	Downgrade
1454764	1445102	Duplication	NM_000271	Pathogenic	criteria_provided,_multiple_submitters,_no_conflicts	splicing_variant	LOF	PVS1|PM2|PP5m	P	intron_variant	PM2|PP3|PP5m	VUS	Downgrade
88866	94435	Deletion	NM_001031726	Pathogenic	criteria_provided,_multiple_submitters,_no_conflicts	splicing_variant	LOF	PVS1|PM4|PP5m	P	inframe_variant	PM4|PP3|PP5m	VUS	Downgrade
417999	410756	Microsatellite	NM_000022	Likely_pathogenic	criteria_provided,_multiple_submitters,_no_conflicts	splicing_variant	LOF	PVS1|PP5m	LP	intron_variant	PP3|PP5m	VUS	Downgrade
216652	213482	Deletion	NM_007194	Pathogenic	criteria_provided,_multiple_submitters,_no_conflicts	splicing_variant	LOF	PVS1|PP5m	LP	intron_variant	PP3|PP5m	VUS	Downgrade
497147	488571	Duplication	NM_004006	Pathogenic	criteria_provided,_multiple_submitters,_no_conflicts	splicing_variant	LOF	PVS1|PM2|PP5m	P	intron_variant	PM2|PP3|PP5m	VUS	Downgrade
44442	53609	Deletion	NM_002294	Pathogenic	criteria_provided,_multiple_submitters,_no_conflicts	splicing_variant	LOF	PVS1|PP5m	LP	intron_variant	PP3|PP5m	VUS	Downgrade

## Sheet: VEP_PVS1-loss_summary
PVS1-loss
ClinVar LoF	31640
VEP inconsistant with ClinVar	882
ClinVar LoF and VEP not LoF (PVS1-loss)	67
ClinVar LoF and VEP not LoF and no conflict	48
	ClinVar_Curated_Classes
VEP_Curated_Classes	P	LP	LB	B	All
no change	0	0	1	14	15
downgrade	19	14	0	0	33
SUM	19	14	1	14	48

## Sheet: VEP_PVS1-gain no conflict
VariationID	AlleleID	Type	NM	ClinVar_CLNSIG	ClinVar_CLNREVSTAT	ClinVar_Coding_impact	ClinVar_Category	ACMG_rule_ClinVar_coding_impact	ClinVar_Curated_Classes	VEP_coding impact	ACMG_rule_ VEP_coding_impact	VEP_Curated_Classes	Grade_Change
90779	96254	Deletion	NM_000251	Pathogenic	reviewed_by_expert_panel	genic_downstream_transcript_variant	Others	PM1|PP5vs	LP	splicing_variant	PVS1|PM1|PP5vs	P	No change

## Sheet: VEP_PVS1-gain_summary
PVS1-gain
ClinVar not LoF	132909
VEP inconsistant with ClinVar	184
ClinVar not LoF and VEP LoF (PVS1-gain)	12
ClinVar not LoF and VEP LoF and no conflict	1
	ClinVar_Curated_Classes
VEP_Curated_Classes	P	LP	LB	B	All
no change	0	1	0	0	1
upgrade	0	0	0	0	0
SUM	0	1	0	0	1

## Sheet: VEP_PVS1-change summary
ClinVar LoF and VEP not LoF and no conflict (PVS1-loss)	48
ClinVar not LoF and VEP LoF and no conflict (PVS1-gain)	1
		ClinVar_Curated_Classes
	VEP_Curated_Classes	P	LP	LB	B	All
	no change	0	1	1	14	16
	downgrade	19	14	0	0	33
	upgrade	0	0	0	0	0
	SUM	19	15	1	14	49
Note
* no conflict: ClinVar_CLNSIG VS. ClinVar_Curated_Classes
1. BLB>BLB=no conflict
2. PLP>PLP=no conflict
*downgrade or upgrade: VEP_Curated_Classes VS. ClinVar_Curated_Classes
1. BLB>BLB=no change
2. PLP>PLP=no change
